# Supplementary material for: Exciton coupling in diketopyrrolopyrrole–helicene derivatives leads to red and near-infrared circularly polarized luminescence
Source: PubMed Central journal article supplement — Chem Sci. 2017 Nov 15;9(3):735–42. doi: 10.1039/c7sc04312k (PMC5872492; doi:10.1039/c7sc04312k), 2017-11-15
Supplement: SC-009-C7SC04312K-s001.pdf [file SC-009-C7SC04312K-s001.pdf]

## Electronic Supporting Information for

### Exciton coupling in diketopyrrolopyrrole-helicene derivatives leads to red and near-infrared circularly polarized luminescence

Kais Dhbaibi,<sup>a,g</sup> Ludovic Favereau,<sup>a,\*</sup> Monika Srebro-Hooper,<sup>b</sup> Marion Jean,<sup>c</sup> Nicolas Vanthuyne,<sup>c</sup> Francesco Zinna,<sup>d,†</sup> Bassem Jamoussi,<sup>e</sup> Lorenzo Di Bari,<sup>d,\*</sup> Jochen Autschbach,<sup>f,\*</sup> and Jeanne Crassous<sup>a,\*</sup>

a. Institut des Sciences Chimiques de Rennes UMR 6226, Campus Beaulieu, 35042 Rennes Cedex (France). E-mails: ludovic.favereau@univ-rennes1.fr; jeanne.crassous@univ-rennes1.fr.

b. Faculty of Chemistry, Jagiellonian University, Gronostajowa 2, 30-387 Krakow (Poland).

c. Aix Marseille University, CNRS, Centrale Marseille, iSm2, Marseille (France).

d. Dipartimento di Chimica e Chimica Industriale (University of Pisa), via Moruzzi 13, 56124, Pisa (Italy). E-mail: lorenzo.dibari@unipi.it.

e. Laboratoire de Chimie Organique et Analytique, Institut Supérieur de l'Éducation et de la Formation Continue, 2000 Bardo (Tunisia).

f. Department of Chemistry, University at Buffalo, State University of New York, Buffalo, NY 14260 (USA). E-mail: jochena@buffalo.edu.

g. Faculty of Science of Gabès, Zrig, 6072 Gabès (Tunisia).

† Current address: Université de Genève, Département de Chimie Organique, Quai Ernest-Ansermet 30, 1211 Genève 4.

## 1. Experimental procedures

### General method

<sup>1</sup>H and <sup>13</sup>C NMR spectra were recorded at room temperature on an *AVANCE III 400 BRUKER* or an *AVANCE I 500 BRUKER* at Centre Régional de Mesures Physiques de l'Ouest (CRMPO), Université de Rennes 1. Chemical shifts  $\delta$  are given in ppm and coupling constants  $J$  in Hz. Chemical shifts for <sup>1</sup>H NMR spectra are referenced relative to residual protium in the deuterated solvent ( $\delta = 7.26$  ppm, CDCl<sub>3</sub>). <sup>13</sup>C shifts are referenced to CDCl<sub>3</sub> peaks at  $\delta = 77.16$  ppm.

High-resolution mass (HR-MS) determinations were performed at CRMPO on a Bruker MaXis 4G by ASAP (+ or -) or ESI with CH<sub>2</sub>Cl<sub>2</sub> as solvent techniques. Experimental and calculated masses are given with consideration of the mass of the electron.

UV-Visible (UV-vis, in M<sup>-1</sup> cm<sup>-1</sup>) absorption spectra were recorded on a UV-2401PC Shimadzu spectrophotometer. Fluorescence spectra were recorded on a FL 920 Edinburgh fluorimeter.

Fluorescence quantum yields  $\Phi$  were measured in diluted solution using the following equation:

$$\frac{\Phi_x}{\Phi_r} = \left( \frac{A_r(\lambda)}{A_x(\lambda)} \right) \left( \frac{n_x^2}{n_r^2} \right) \left( \frac{D_x}{D_r} \right)$$

where:  $A(\lambda)$  is the absorbance at the excitation wavelength  $\lambda$ ,  $n$  is the refractive index,  $D$  is the integrated intensity, and “r” and “x” stand for reference and sample, respectively. The fluorescence quantum yields were measured relative to rhodanine 6G in ethanol ( $\Phi = 0.91$ ) for DPP compounds and to quinine sulfate in 0.5 M sulfuric acid ( $\Phi = 0.59$ ) for **H6(TMS)<sub>2</sub>**.<sup>1,1</sup> Excitation of reference and sample compounds was performed at the same wavelength.

Electrochemical measurements were performed with a potentiostat-galvanostat AutoLab PGSTAT 302N controlled by resident GPES (General Purpose Electrochemical System 4.9) software using a conventional single-compartment three-electrode cell. The working and auxiliary electrodes were platinum electrodes and the reference electrode was the saturated potassium chloride calomel electrode (SCE). The supporting electrolyte was 0.1 N Bu<sub>4</sub>NPF<sub>6</sub> (tetrabutylammonium hexafluorophosphate) in dichloromethane and solutions were purged with argon before the measurements. All potentials are quoted relative to SCE. In the experiments, the scan rate was either 100 or 200 mV/s.

Electronic circular dichroism (ECD, in M<sup>-1</sup> cm<sup>-1</sup>) was measured on a Jasco J-815 Circular Dichroism Spectrometer (IFR140 facility - Biosit - Université de Rennes 1).

The circularly polarized luminescence (CPL) measurements were performed using a home-built CPL spectrofluoropolarimeter (see below for a description). The samples were excited using a 90° geometry with a green InGaN (3 mm, 2 V) LED source (Lucky light Electronics Co., LTD,  $\lambda_{\text{max}} = 517$  nm, HWHM = 15 nm). The following parameters were used: emission slit width  $\approx 10$  nm, integration time = 4 sec, scan speed = 60 nm/min, accumulations = 4. The concentration of all the samples was 10<sup>-6</sup> M. The details of the instrument are given in [Zinna, et al., *Chem. Eur. J.*, **2016**, 22, 16089].

Thin-layer chromatography (TLC) was performed on aluminum sheets precoated with Merck 5735 Kieselgel 60F254. Column chromatography was carried out with Merck 5735 Kieselgel 60F (0.040-0.063 mm mesh). Chemicals were purchased from Sigma-Aldrich, Alfa Aesar or TCI Europe and used as received.

## Synthetic procedures

*P*- and *M*-2,15-bis((trimethylsilyl)ethynyl)[6]helicene (*P*- and *M*-**H6(TMS)<sub>2</sub>**), 3-(5-bromothiophen-2-yl)-2,5-dioctyl-6-(thiophen-2-yl)pyrrolo[3,4-*c*]pyrrole-1,4(2*H*,5*H*)-dione (**DPPBr**), and 3-(5-bromothiophen-2-yl)-2,5-dioctyl-6-(thiophen-2-yl)pyrrolo[3,4-*c*]pyrrole-1,4(2*H*,5*H*)-dione (**DPPBr<sub>2</sub>**) were prepared using previously reported procedures.<sup>1,2,1,3</sup>

### Synthetic procedure for **H6DPP** and **H6(DPP)<sub>2</sub>**

Enantiopure *P*- or *M*-**H6(TMS)<sub>2</sub>** (75 mg, 0.14 mmol) was dissolved in CHCl<sub>3</sub> (5 mL). Tetra-*n*-butylammonium fluoride (1.0 M solution in THF) was added dropwise to the stirred solution until an optimal product mixture was reached, mainly composed of the mono- and fully deprotected hexahelicene derivatives (the progress of the reaction was carefully monitored by TLC after addition of each 15 drops of TBAF solution). Then, the reaction was quenched with CH<sub>3</sub>COOH (0.1 mL, 1.7 mmol) and the mixture immediately passed through a short plug of silica gel (CH<sub>2</sub>Cl<sub>2</sub>). The mono- (*P*- and *M*-**H6a**) and fully deprotected (*P*- and *M*-**H6b**) hexahelicene derivatives mixture was directly used in the next steps without further purification.

The mixture of *P*- and *M*-**H6a** or *P*- and *M*-**H6b** and **DPPBr** (347 mg, 0.58 mmol) was placed in an oven-dried flask of 25 mL under argon. Then 7 mL of dry toluene and 3 mL of dry Et<sub>3</sub>N were added and the resulting solution was freed from oxygen by three freeze-pump-thaw cycles. Pd(PPh<sub>3</sub>)<sub>4</sub> (17 mg, 0.01 mmol) and CuI (5.5 mg, 0.03 mmol) were added and the solution was refluxed for 3 hours. After cooling down to room temperature, the solution was passed through a short silica plug (CH<sub>2</sub>Cl<sub>2</sub>). The crude mixture was further purified by column chromatography (toluene/CHCl<sub>3</sub>: 100/0 to 95/5) and size-exclusion chromatography (BioBeads SX-2, CHCl<sub>3</sub>) before precipitated using CHCl<sub>3</sub>/MeOH to yield *P*- and *M*-**H6DPP** (32 mg, 70%) or *P*- and *M*-**H6(DPP)<sub>2</sub>** (51 mg, 75%) as dark red solids.

### **H6DPP**

<sup>1</sup>H NMR (400 MHz, Chloroform-*d*) δ 8.95 (dd, *J* = 3.9, 1.1 Hz, 1H), 8.91 (d, *J* = 4.2 Hz, 1H), 8.06-8.01 (m, 2H), 8.01-7.96 (m, 3H), 7.95 (bs, 1H), 7.93-7.89 (m, 2H), 7.80 (d, *J* = 8.3 Hz, 1H), 7.78-7.72 (m, 3H), 7.64 (dd, *J* = 4.0 Hz, 1.2 Hz, 1H), 7.39 (dd, *J* = 8.2, 1.6 Hz, 1H), 7.31-7.29 (m, 1H), 7.29-7.27 (m, 1H), 7.19 (d, *J* = 4.1 Hz, 1H), 4.07 (q, *J* = 6.9 Hz, 4H), 1.82-1.70 (m, 4H), 1.53-1.20, (m, 22H), 0.93-0.82 (m, 6H), 0.17-0.15 (m, 9H).

<sup>13</sup>C NMR (100 MHz, Chloroform-*d*) δ 161.7, 140.5, 139.5, 135.9, 135.9, 133.8, 133.1, 132.5, 132.4, 132.3, 132.2, 131.3, 130.6, 130.2, 129.6, 129.4, 129.3, 129.1, 128.5, 128.4, 128.2, 128.1, 128.0, 128.0, 127.9, 127.9, 127.8, 127.8, 127.6, 127.5, 124.4, 119.8, 118.7, 108.8, 108.3, 105.8, 98.9, 93.8, 82.1, 42.8, 42.8, 32.3, 32.3, 30.6, 30.4, 29.8, 29.7, 29.7, 29.7, 27.4, 27.4, 23.1, 23.1, 14.6, 0.3.

HR-MS Bruker MaXis 4G, ASAP (+), 360°C; ion [M+H]<sup>+</sup>, C<sub>63</sub>H<sub>63</sub>N<sub>2</sub>O<sub>2</sub>Si<sub>2</sub>, m/z calculated 971.40948, m/z experimental 971.4089 (Δ=1 ppm).

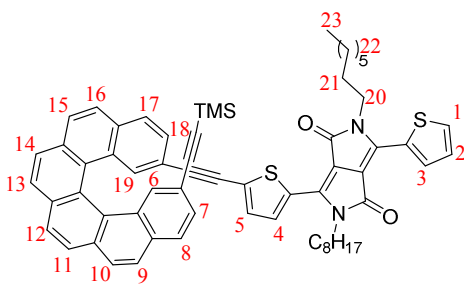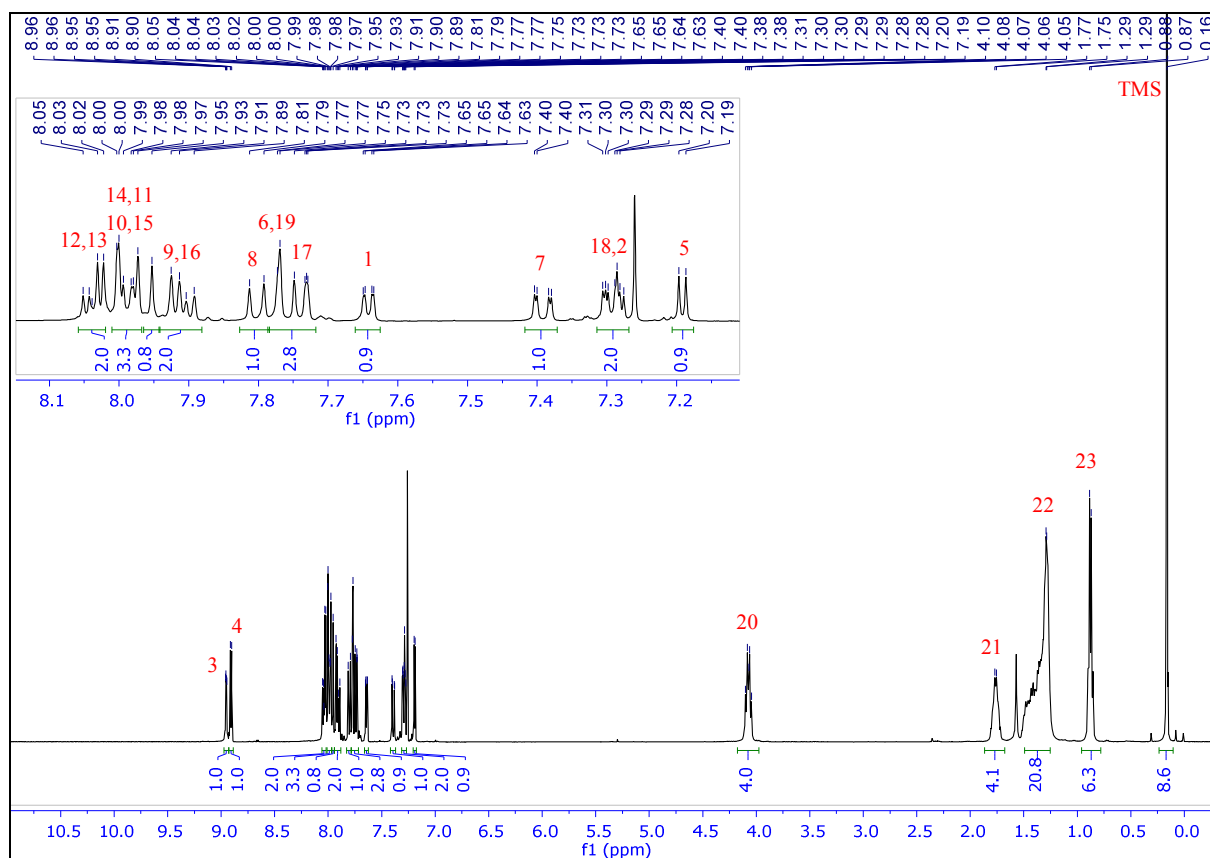

**Figure S1.1.**  $^1\text{H}$  NMR spectrum of **H6DPP** in  $\text{CDCl}_3$  at 298 K (400 MHz).

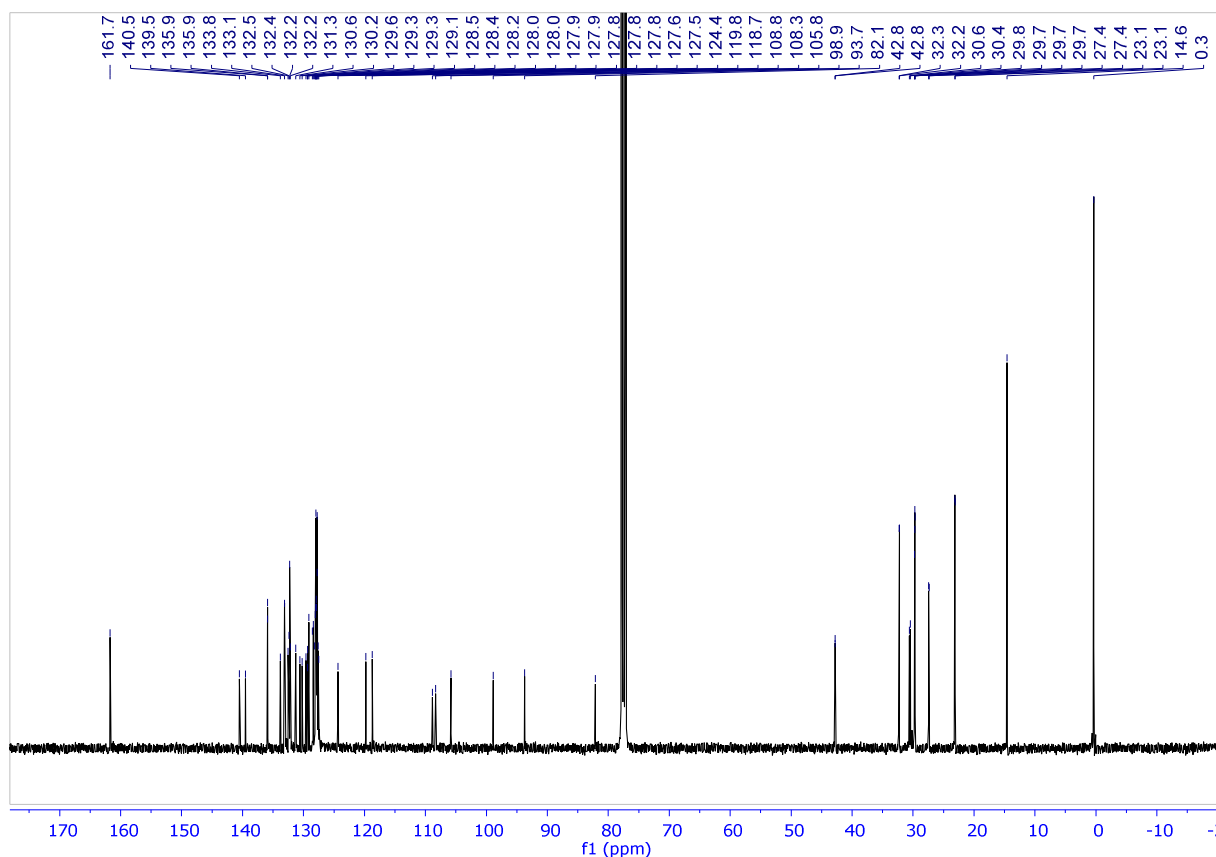

**Figure S1.2.**  $^{13}\text{C}$  NMR spectrum of **H6DPP** in  $\text{CDCl}_3$  at 298 K (100 MHz).

### **H6(DPP)<sub>2</sub>**

**$^1\text{H}$  NMR (500 MHz, Chloroform-*d*)**  $\delta$  8.95 (dd,  $J = 3.9, 1.1$  Hz, 2H), 8.91 (d,  $J = 4.1$  Hz, 2H), 8.07 (d,  $J = 8.2$  Hz, 2H), 8.02 (d,  $J = 8.2$  Hz, 2H), 8.01 (d,  $J = 8.6$  Hz, 2H), 7.96 (d,  $J = 8.6$  Hz, 2H), 7.84 (d,  $J = 8.3$  Hz, 2H), 7.79 (m, 2H), 7.65 (dd,  $J = 5.0$  Hz and 1.1 Hz, 2H), 7.38 (dd,  $J = 8.2$  Hz and 1.6 Hz, 2H), 7.30 (m, 2H), 7.21 (d,  $J = 4.1$  Hz, 2H), 4.08 (q,  $J = 8.6$  Hz, 9H), 1.79 – 1.73 (m, 8H), 1.50 – 1.23 (m, 40H), 0.90 – 0.82 (m, 12H).

**$^{13}\text{C}$  NMR (125 MHz, Chloroform-*d*)**  $\delta$  161.2, 140.0, 138.9, 135.4, 135.3, 133.3, 132.6, 132.0, 131.9, 131.8, 130.8, 130.1, 129.7, 129.0, 128.7, 128.6, 127.8, 127.5, 127.4, 126.9, 123.8, 118.3, 108.3, 107.8, 98.2, 81.7, 42.2, 31.7, 31.7, 30.0, 29.9, 29.2, 29.2, 29.1, 29.1, 26.9, 26.8, 22.5, 14.0.

**HR-MS** Thermo-Fisher Q-Exactive, ESI (+),  $\text{CH}_2\text{Cl}_2$ ; ion  $[\text{M}]^+$ ;  $\text{C}_{90}\text{H}_{92}\text{N}_4\text{O}_4\text{S}_4$ ,  $m/z$  calculated 1420.60015,  $m/z$  experimental 1420.5994 ( $\Delta=0$  ppm).

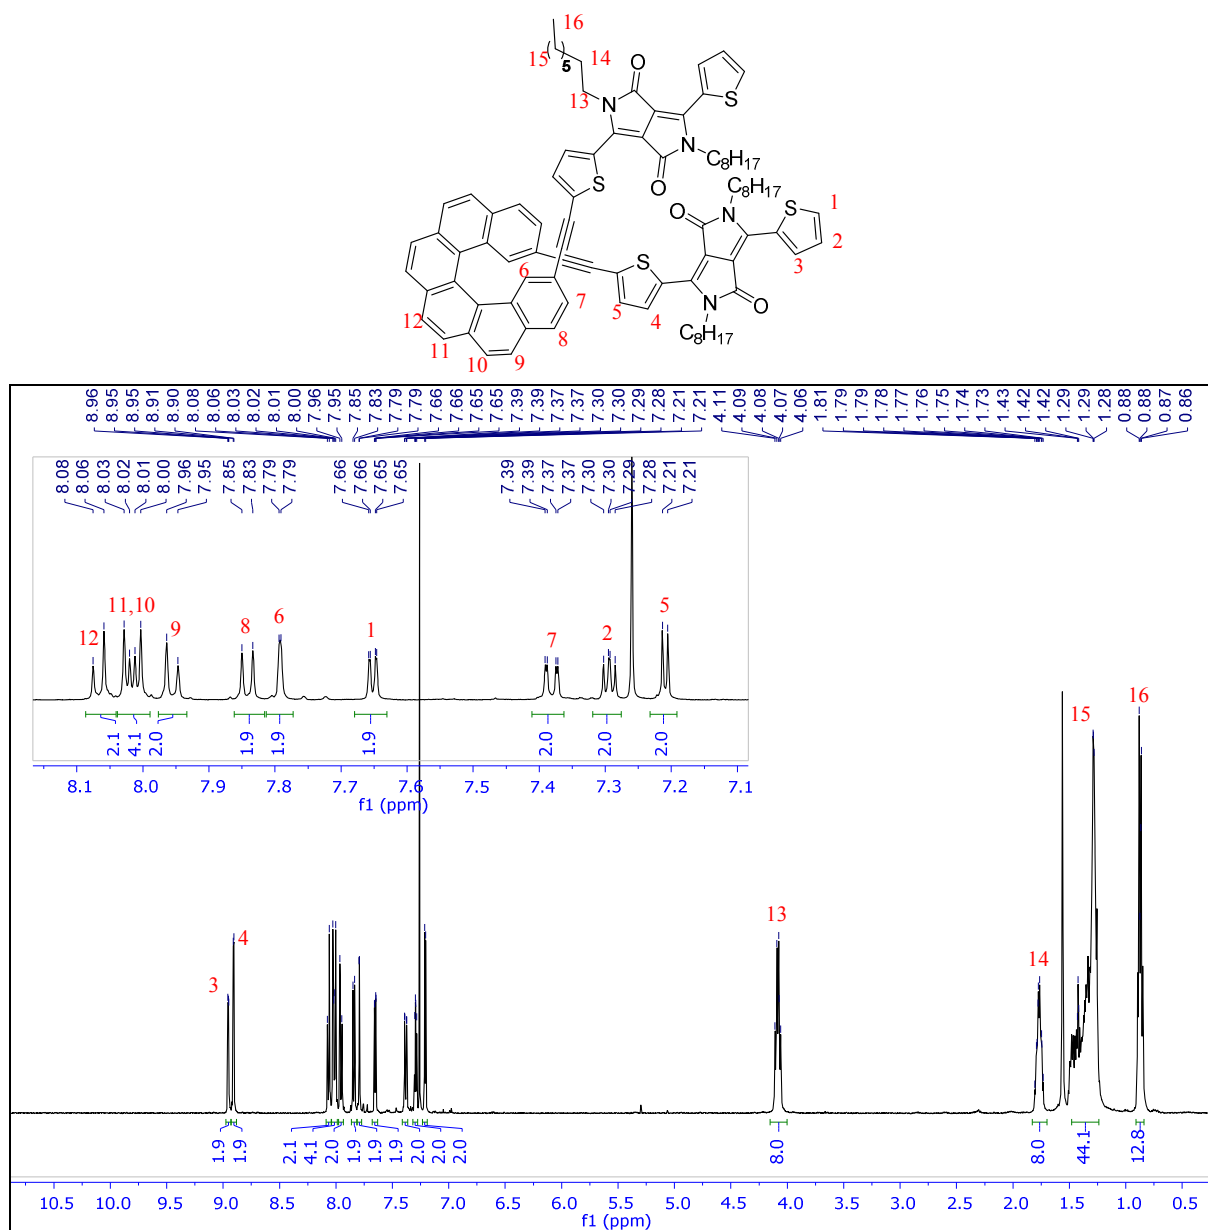

**Figure S1.3.**  $^1\text{H NMR}$  spectrum of  $\text{H6(DPP)}_2$  in  $\text{CDCl}_3$  at 298 K (500 MHz).

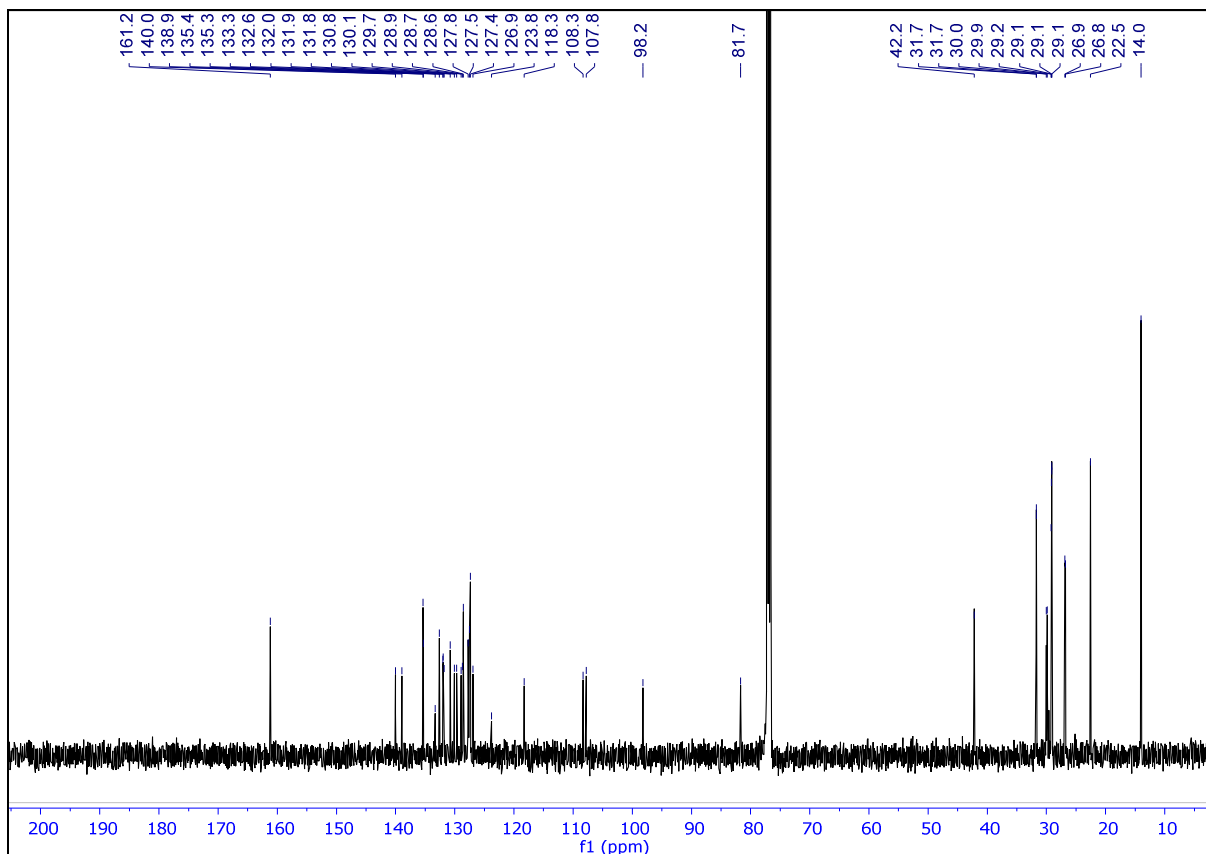

**Figure S1.4.**  $^{13}\text{C}$  NMR spectrum of **H6(DPP)<sub>2</sub>** in  $\text{CDCl}_3$  at 298 K (125 MHz).

#### Synthetic procedure for **DPP(H6DPP)<sub>2</sub>**

Enantiopure *P*- or *M*-**H6DPP** (20 mg, 0.02 mmol) was dissolved in  $\text{CH}_2\text{Cl}_2$  (5 mL). Tetra-*n*-butylammonium fluoride (0.1 mL, 1.0 M solution in THF) was added dropwise and the resulting solution was stirred for 0.5 hour. Then, the mixture was passed through a short plug of silica gel ( $\text{CH}_2\text{Cl}_2$ ) to afford deprotected *P*- or *M*-**H6DPPa** which was directly used in the next step without further purification.

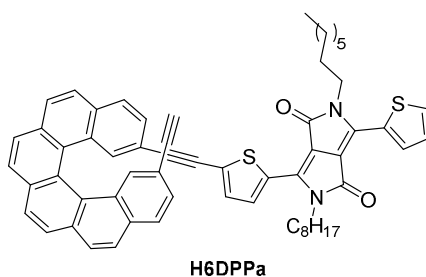

*P*- or *M*-**H6DPPa** (18 mg, 0.02 mmol) and **DPPBr<sub>2</sub>** (6.2 mg, 9.3  $\mu\text{mol}$ ) were placed in an oven-dried flask of 25 mL under argon. Then 7 mL of dry toluene and 3 mL of dry  $\text{Et}_3\text{N}$  were added and the resulting solution was freed from oxygen by three freeze-pump-thaw cycles.  $\text{Pd}(\text{PPh}_3)_4$  (2.4 mg, 0.2  $\mu\text{mol}$ ) and  $\text{CuI}$  (1.0 mg, 0.4  $\mu\text{mol}$ ) were added and the solution was refluxed for 3 hours. After cooling down to room temperature, the solution was passed

through a short silica plug (CH<sub>2</sub>Cl<sub>2</sub>). The crude mixture was further purified by column chromatography (CHCl<sub>3</sub>) and size-exclusion chromatography (BioBeads SX-2, CHCl<sub>3</sub>) before precipitated using CHCl<sub>3</sub>/MeOH to yield *P*- and *M*-**DPP(H6DPP)**<sub>2</sub> (respectively 11 and 14 mg, 50 and 65%).

**<sup>1</sup>H NMR (500 MHz, Chloroform-*d*)** δ 8.96 (dd, *J* = 3.9, 1.1 Hz, 2H), 8.94 (d, *J* = 4.1 Hz, 2H), 8.91 (d, *J* = 4.1 Hz, 2H), 8.09 – 8.03 (m, 7H), 8.03 – 7.99 (m, 7H), 7.99 – 7.94 (m, 4H), 7.85 (dd, *J* = 8.3, 2.0 Hz, 4H), 7.80 – 7.78 (m, 2H), 7.66 (dd, *J* = 5.0, 1.2 Hz, 2H), 7.41 – 7.37 (m, 3H), 7.30 (dd, *J* = 5.0, 3.9 Hz, 2H), 7.22 (m, 4H), 4.16 – 4.04 (m, 12H), 1.84 – 1.70 (m, 12H), 1.52 – 1.17 (m, 60H), 0.94 – 0.79 (m, 18H).

**<sup>13</sup>C NMR (125 MHz, Chloroform-*d*)** δ 161.4, 161.3, 140.3, 139.2, 139.2, 135.8, 135.6, 135.6, 133.6, 132.9, 132.8, 132.4, 132.3, 132.2, 132.1, 131.0, 130.3, 130.20, 129.9, 129.2, 129.0, 128.8, 128.0, 127.8, 127.8, 127.6, 127.2, 127.1, 124.0, 118.5, 108.8, 108.6, 108.0, 98.7, 98.4, 82.0, 81.9, 77.4, 42.6, 42.5, 32.0, 31.9, 30.3, 30.1, 29.9, 29.6, 29.5, 29.4, 29.3, 27.2, 27.1, 27.0, 22.9, 22.8, 14.3.

**HR-MS** Thermo-Fisher Q-Exactive, ESI (+), CH<sub>2</sub>Cl<sub>2</sub>; ion [M]<sup>+</sup>, C<sub>150</sub>H<sub>144</sub>N<sub>6</sub>O<sub>6</sub>S<sub>6</sub>, *m/z* calculated 2316.94662, *m/z* experimental 2316.9409 (Δ=2 ppm).



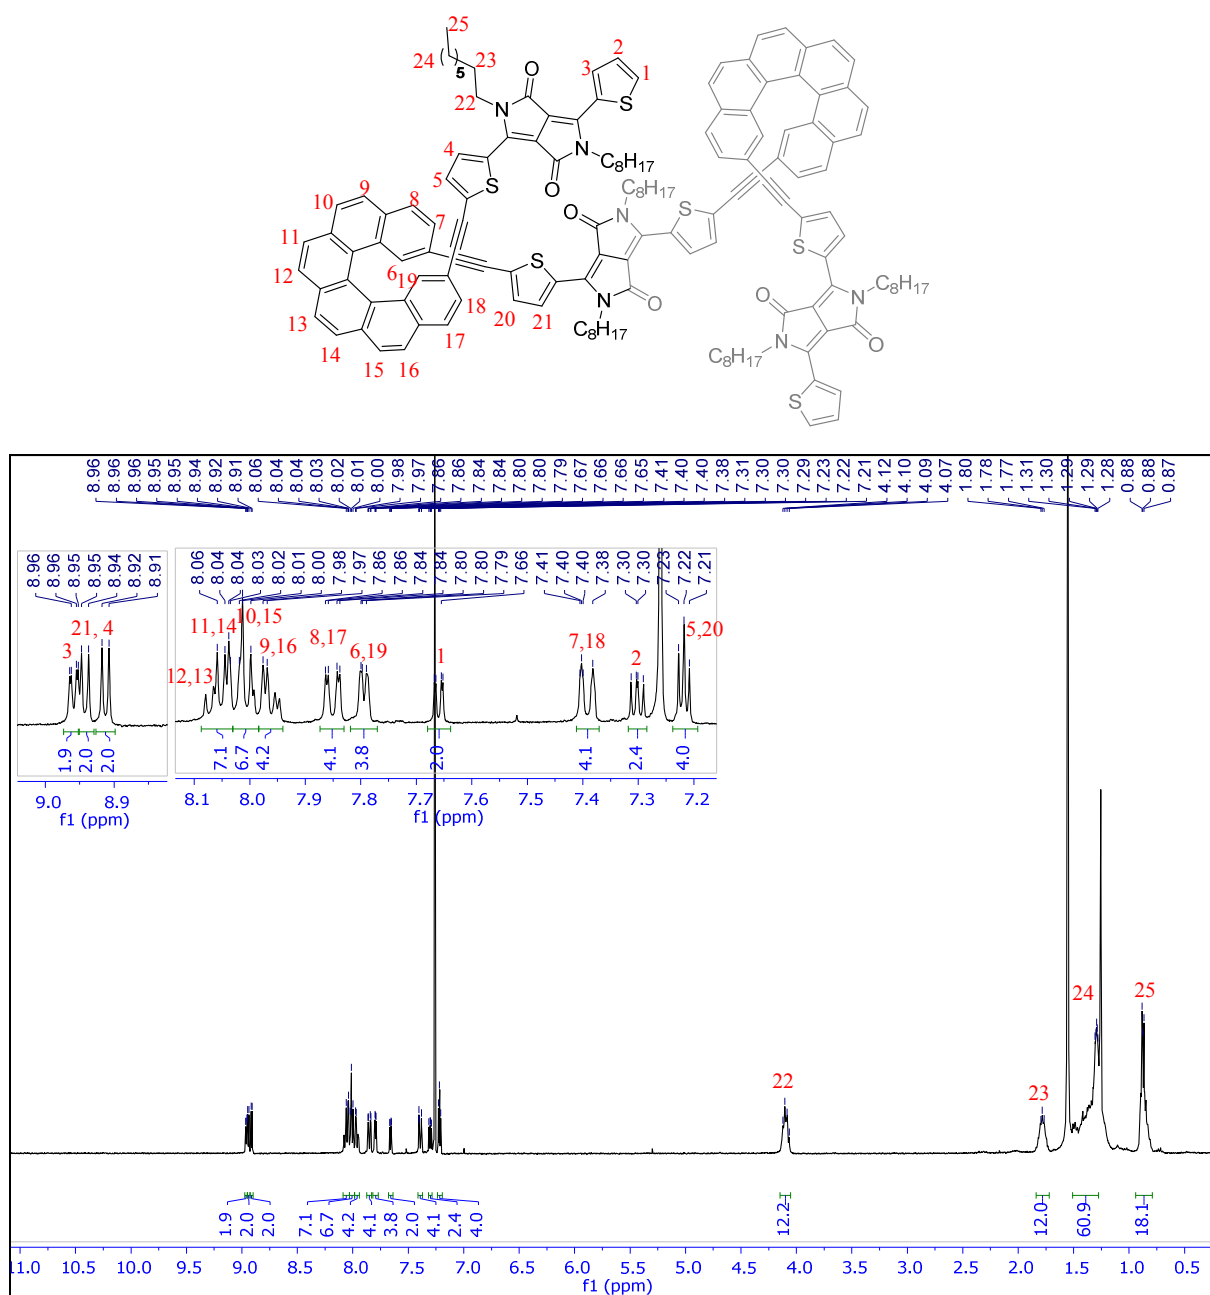

Figure S1.5.  $^1\text{H}$  NMR spectrum of  $\text{DPP}(\text{H6DPP})_2$  in  $\text{CDCl}_3$  at 298 K (400 MHz).

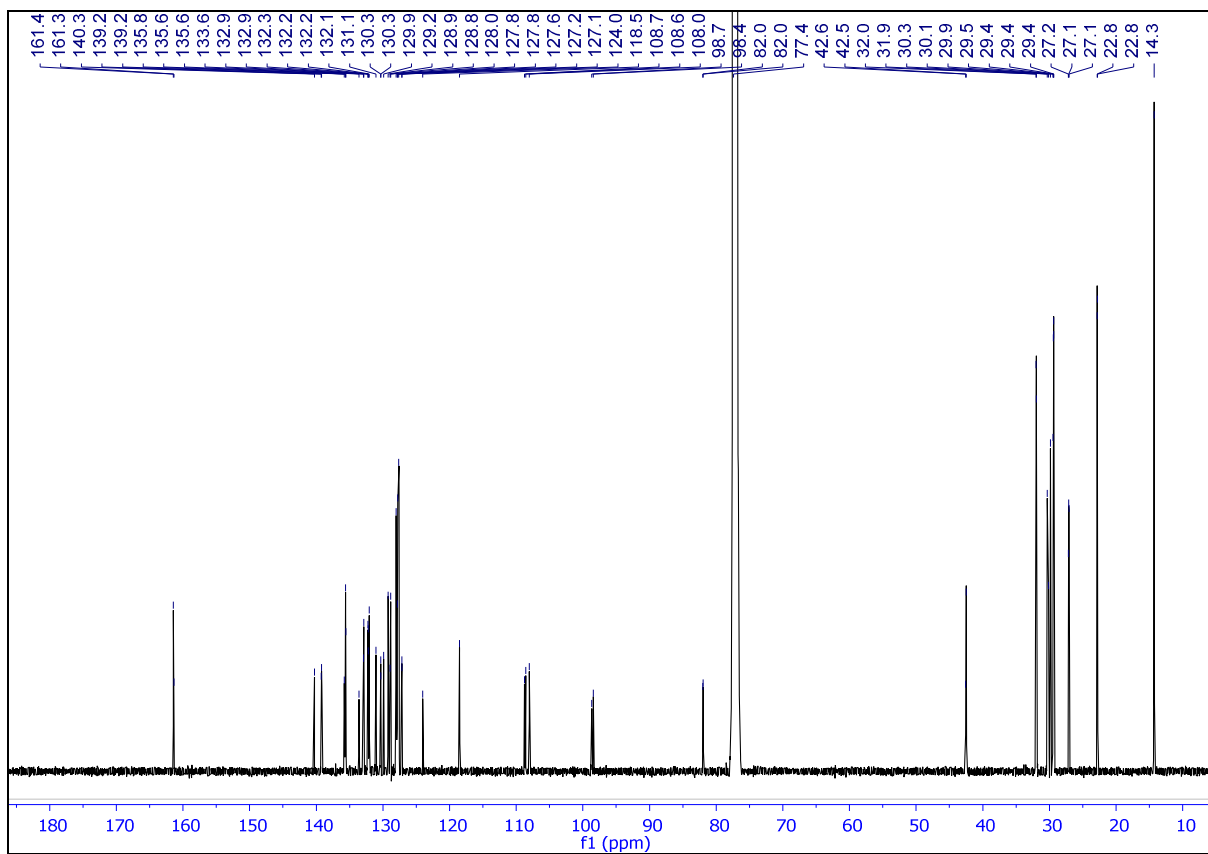

Figure S1.6.  $^{13}\text{C}$  NMR spectrum of **DPP(H6DPP)<sub>2</sub>** in  $\text{CDCl}_3$  at 298 K (125 MHz).

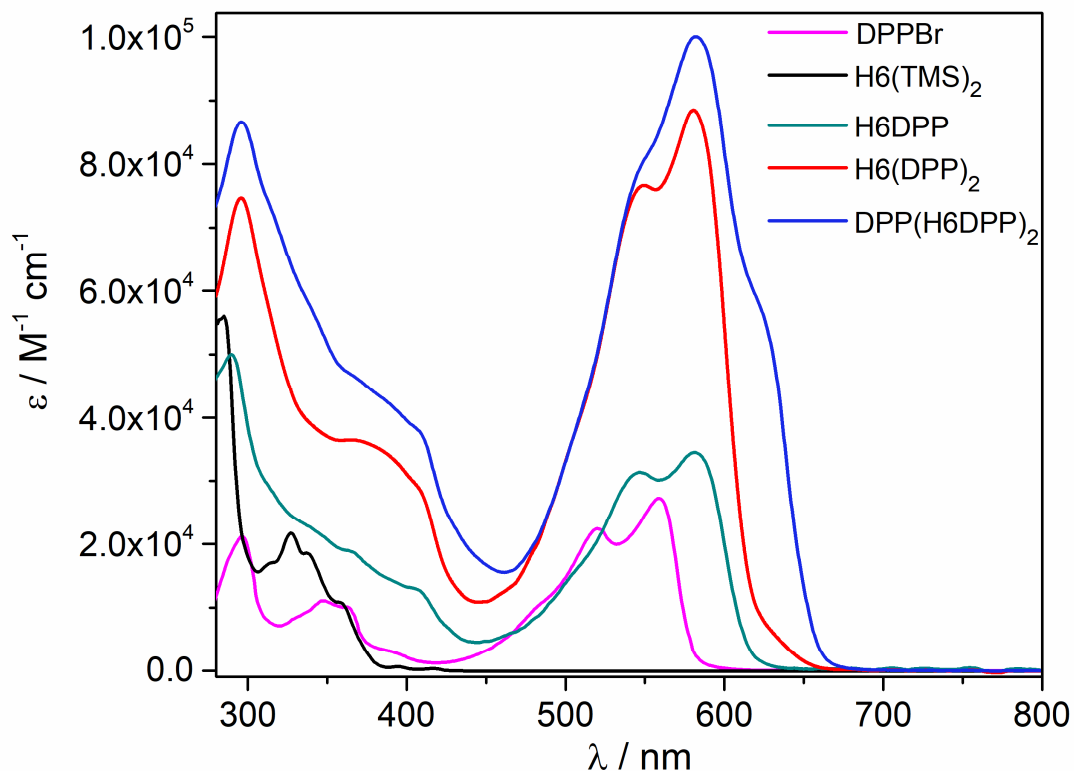

**Figure S1.7.** UVvis spectra of **H6(TMS)<sub>2</sub>** (black), **DPPBr** (purple), **H6DPP** (green), **H6(DPP)<sub>2</sub>** (red) and **DPP(H6DPP)<sub>2</sub>** (blue) compounds in dichloromethane solution at 298 K ( $\sim 10^{-5}$  M).

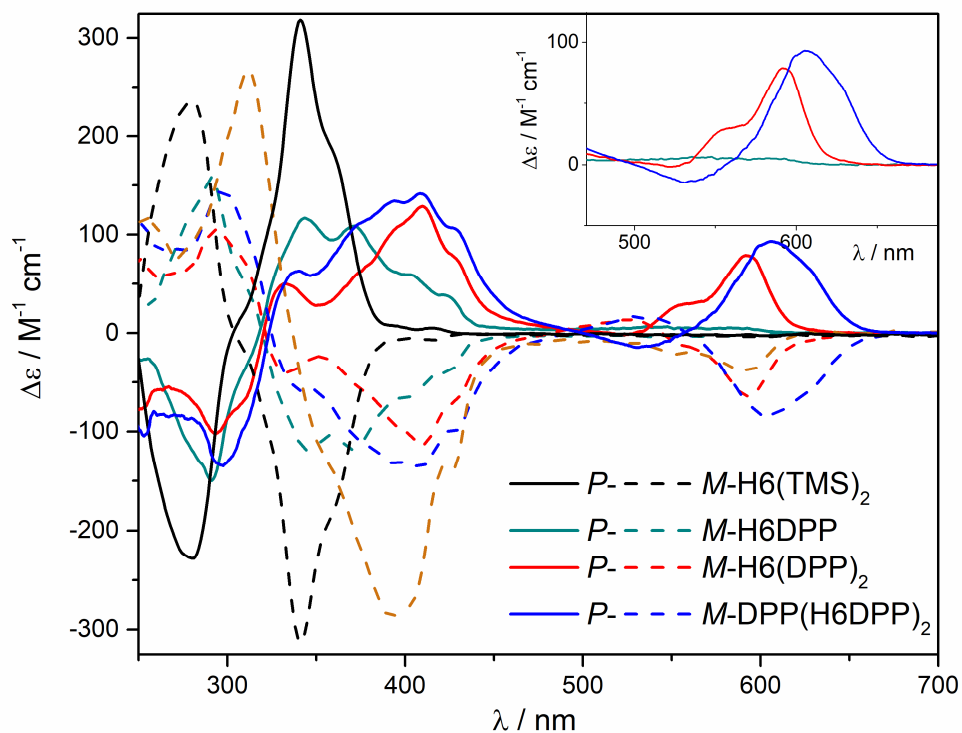

**Figure S1.8.** ECD spectra of *P* (solid lines) and *M* (dash lines) enantiopure **H6(TMS)<sub>2</sub>** (black), **H6DPP** (green), **H6(DPP)<sub>2</sub>** (red) and **DPP(H6DPP)<sub>2</sub>** (blue) compounds in dichloromethane solution at 298 K ( $\sim 10^{-5}$  M).

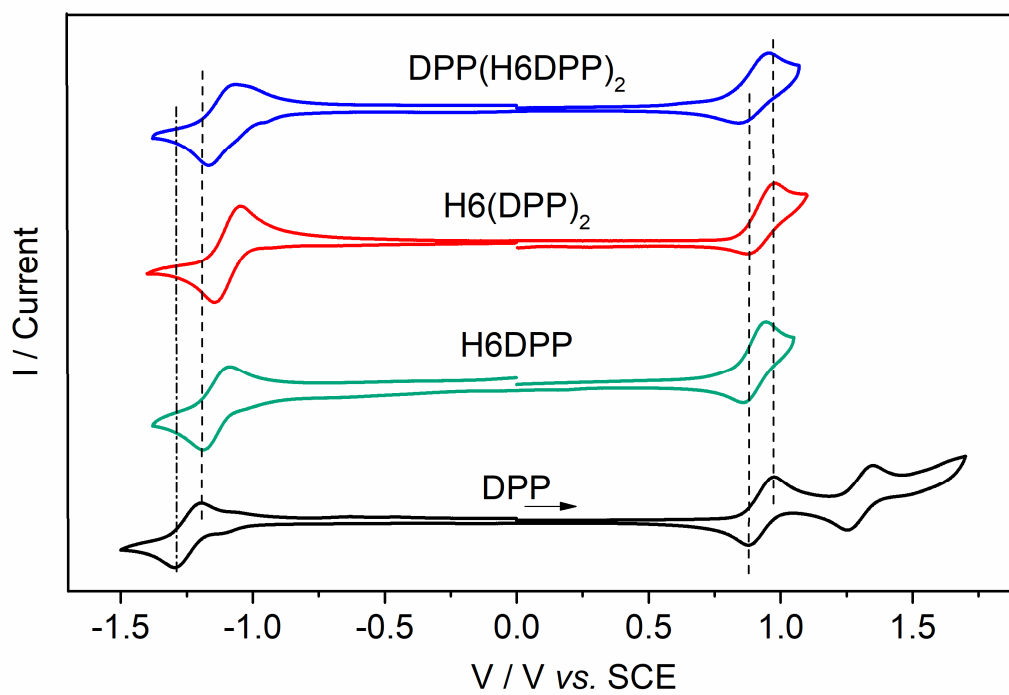

**Figure S1.9.** Cyclic voltammogram of **DPP**, **H6DPP**, **H6(DPP)<sub>2</sub>**, and **DPP(H6DPP)<sub>2</sub>** versus saturated calomel electrode (SCE) as the reference and 0.1 M  $\text{Bu}_4\text{NPF}_6$  in dichloromethane as the electrolyte.

**Table S1.1.** Redox potentials ( $E_{\text{Ox}}$  and  $E_{\text{Red}}$ ) of **DPP**, **H6DPP**, **H6(DPP)<sub>2</sub>**, and **DPP(H6DPP)<sub>2</sub>**, referenced *versus* saturated calomel electrode (SCE) and given in V. Here **DPP** refers to 2,5-dioctyl-3,6-di-2-thienyl-pyrrolo[3,4-c]pyrrole-1,4-dione.<sup>1,4</sup>

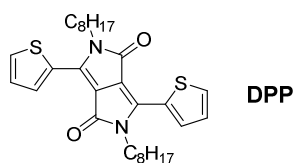

| Compound                      | $E_{\text{Ox}}$<br>DPP <sup>+0</sup> | $E_{\text{Red}}$<br>DPP <sup>0/-</sup> | HOMO <sup>a</sup> (eV) | LUMO <sup>b</sup> (eV) | $E_g^c$ (eV) |
|-------------------------------|--------------------------------------|----------------------------------------|------------------------|------------------------|--------------|
| <b>DPP</b>                    | 0.93                                 | -1.25                                  | -5.67                  | -3.49                  | 2.18         |
| <b>H6DPP</b>                  | 0.90                                 | -1.14                                  | -5.64                  | -3.60                  | 2.04         |
| <b>H6DPP<sub>2</sub></b>      | 0.93                                 | -1.10                                  | -5.67                  | -3.64                  | 2.03         |
| <b>DPP(H6DPP)<sub>2</sub></b> | 0.90                                 | -1.12                                  | -5.64                  | -3.62                  | 2.02         |

<sup>a</sup> HOMO energy levels estimated from electrochemical results using the following equation:<sup>1,5</sup>

$$\text{HOMO} = -(E_{\text{Ox}} + 4.74) \text{ eV}$$

<sup>b</sup> LUMO energy levels estimated from electrochemical results using the following equation:<sup>1,5</sup>

$$\text{LUMO} = -(E_{\text{Red}} + 4.74) \text{ eV}$$

<sup>c</sup> energy gaps ( $E_g$ ) values estimated from the difference between LUMO and HOMO energy levels

**Table S1.2.** Quantum yields (averaged values) of fluorescence for the reported compounds.

| Compound                      | $\phi_{\text{ave}}$ |
|-------------------------------|---------------------|
| <b>H6(TMS)<sub>2</sub></b>    | 0.07 <sup>a</sup>   |
| <b>H6DPP</b>                  | 0.39 <sup>b</sup>   |
| <b>H6(DPP)<sub>2</sub></b>    | 0.41 <sup>b</sup>   |
| <b>DPP(H6DPP)<sub>2</sub></b> | 0.35 <sup>b</sup>   |

<sup>a</sup> relative to quinine sulfate in 0.5 M sulphuric acid

<sup>b</sup> relative to rhodanine 6G in ethanol

## HPLC separations

### - Analytical chiral HPLC separation for $H_6(TMS)_2$

• The sample is dissolved in chloroform, injected on the chiral column, and detected with an UV detector at 254 nm and with circular dichroism detector at 254 nm. The flow-rate is 1 mL/min.

| Column         | Mobile Phase                    | t1       | k1   | t2       | k2   | $\alpha$ | Rs   |
|----------------|---------------------------------|----------|------|----------|------|----------|------|
| (S,S)-Whelk-O1 | Heptane / Dichloromethane 90/10 | 6.82 (-) | 1.31 | 9.40 (+) | 2.19 | 1.67     | 7.56 |

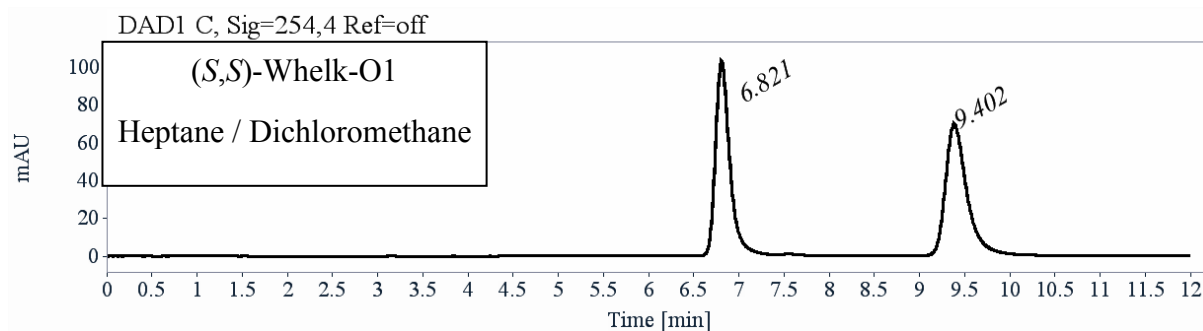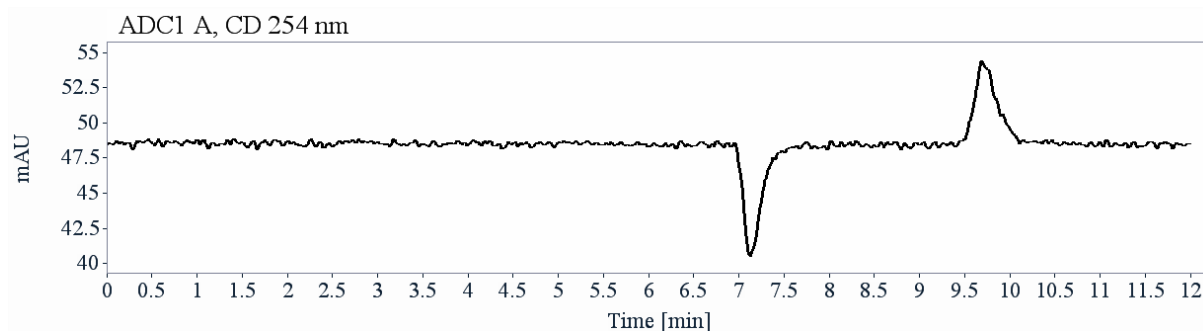

**Signal:** DAD1 C, Sig=254,4 Ref=off

| RT [min] | Area | Area%  | Capacity Factor | Enantioselectivity | Resolution (USP) |
|----------|------|--------|-----------------|--------------------|------------------|
| 6.82     | 1132 | 49.98  | 1.31            |                    |                  |
| 9.40     | 1134 | 50.02  | 2.19            | 1.67               | 7.56             |
| Sum      | 2266 | 100.00 |                 |                    |                  |

### - Semi-preparative separation for compound $H_6(TMS)_2$

- Sample preparation: About 445 mg of  $H_6(TMS)_2$  are dissolved in 30 mL of a mixture hexane/ dichloromethane (87/13).
- Chromatographic conditions: (S,S)-Whelk-O1 (250 x 10 mm), hexane / dichloromethane (90/10) as mobile phase, flow-rate = 5 mL/min, UV detection at 220 nm.
- Injections (stacked): times 300  $\mu$ L, every 4.8 minutes.
- First fraction: 199 mg of the first eluted ((-, CD 254nm)-enantiomer) with ee > 99.5%

- Second fraction: 205 mg of the second eluted ((+, CD 254nm)-enantiomer) with ee > 99.5%
- Chromatograms of the collected fractions:

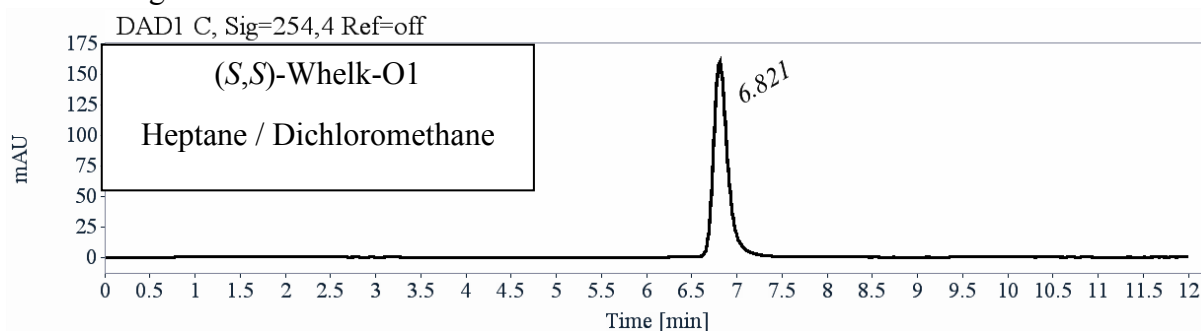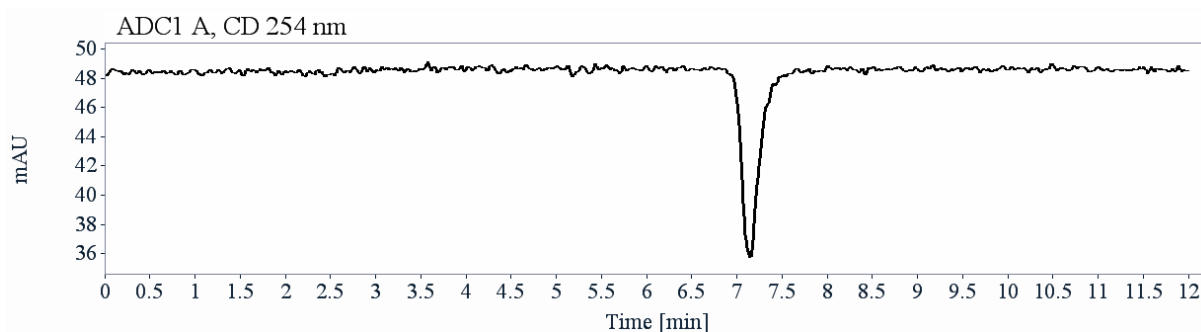

| RT [min] | Area | Area%  |
|----------|------|--------|
| 6.82     | 1746 | 100.00 |
| Sum      | 1746 | 100.00 |

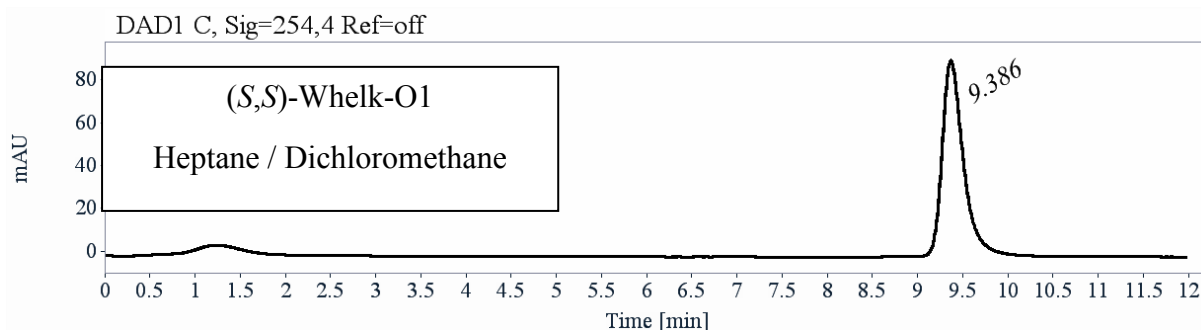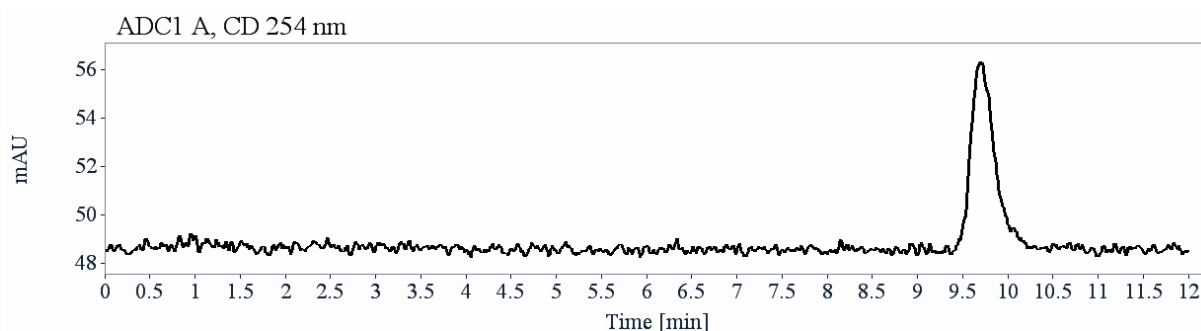

| RT [min] | Area | Area%  |
|----------|------|--------|
| 9.39     | 1477 | 100.00 |
| Sum      | 1477 | 100.00 |

**- Kinetics of enantiomerization of  $H_6(TMS)_2$  in 1,2-dimethoxybenzene**

About 0.4 mg of the second eluted enantiomer of  $H_6(TMS)_2$  is heated in about 25 mL of 1,2-dimethoxybenzene at 207 °C. 20  $\mu$ L are taken and then injected on (S,S)-Whelk-O1 (90:10 heptane / dichloromethane, 1 mL/min, UV 300 nm). The percentage decrease of the second eluted enantiomer of  $H_6(TMS)_2$  is monitored.

| Time (min) | % second eluted enantiomer | $\ln ((\%t-50\%)/(\%t=0)-50\%))$ |
|------------|----------------------------|----------------------------------|
| 0          | 99.587                     | 0.00000                          |
| 1140       | 98.198                     | -0.02841                         |
| 4040       | 94.601                     | -0.10597                         |
| 5415       | 92.951                     | -0.14367                         |
| 6915       | 91.329                     | -0.18216                         |

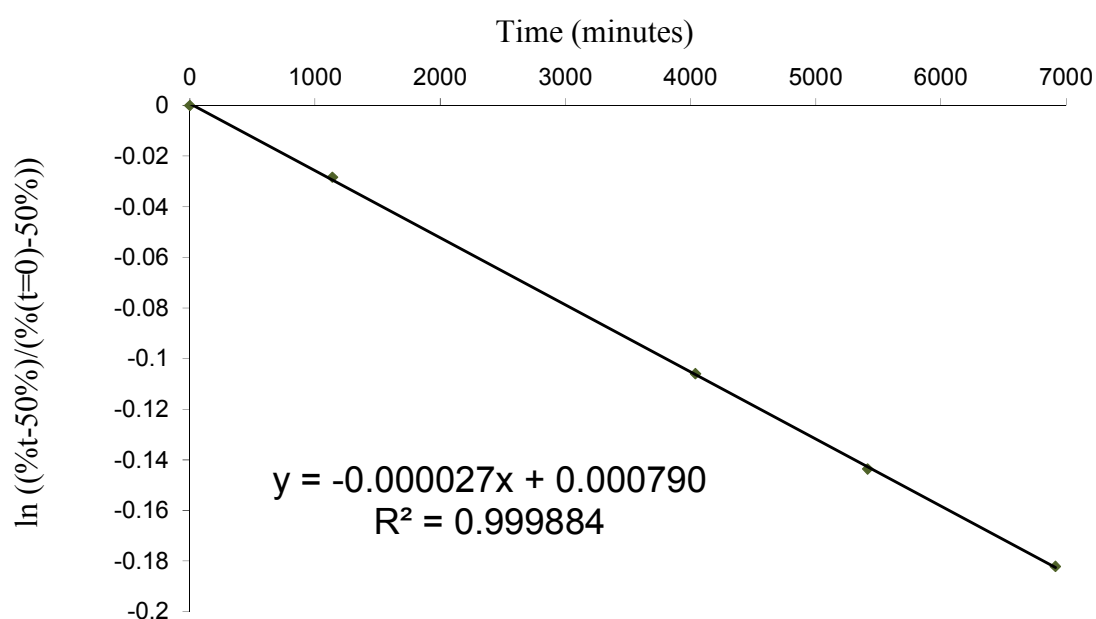

$$k_{\text{enantiomerisation}} = 2.2091\text{E-}07 \text{ s}^{-1} \text{ (207}^\circ\text{C, 1,2-dimethoxybenzene)}$$

$$\Delta G^\ddagger = 180.7 \text{ kJ/mol (207}^\circ\text{C, 1,2-dimethoxybenzene)}$$

$$t_{1/2} = 18 \text{ days (207}^\circ\text{C, 1,2-dimethoxybenzene)}$$



**- Analytical chiral HPLC separation for  $H_6(DPP)_2$**

• A mixture of  $M$ - $H_6(DPP)_2$  and  $P$ - $(H_6(DPP)_2)$  is dissolved in dichloromethane, injected on the chiral column, and detected with an UV detector at 254 nm and with circular dichroism detector at 254 nm. The flow-rate is 1 mL/min.

| Column       | Mobile Phase                                    | t1       | k1   | t2       | k2   | $\alpha$ | Rs   |
|--------------|-------------------------------------------------|----------|------|----------|------|----------|------|
| Chiralpak ID | Heptane / ethanol / dichloromethane<br>50/30/20 | 6.71 (M) | 1.27 | 8.32 (P) | 1.82 | 1.43     | 3.38 |

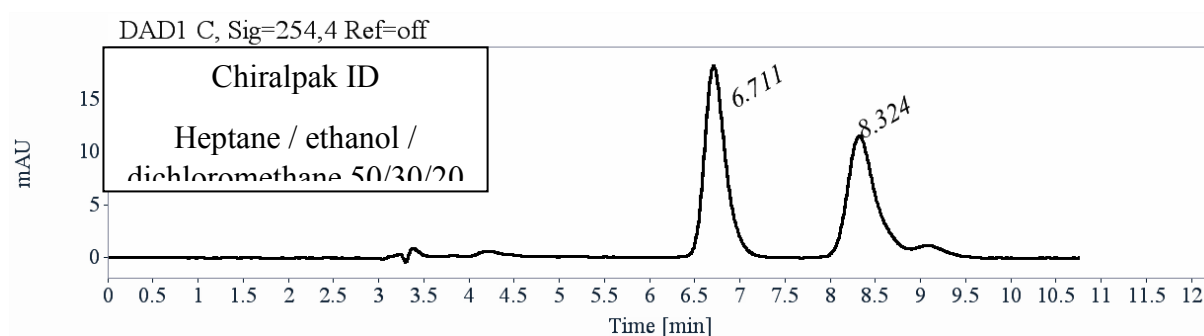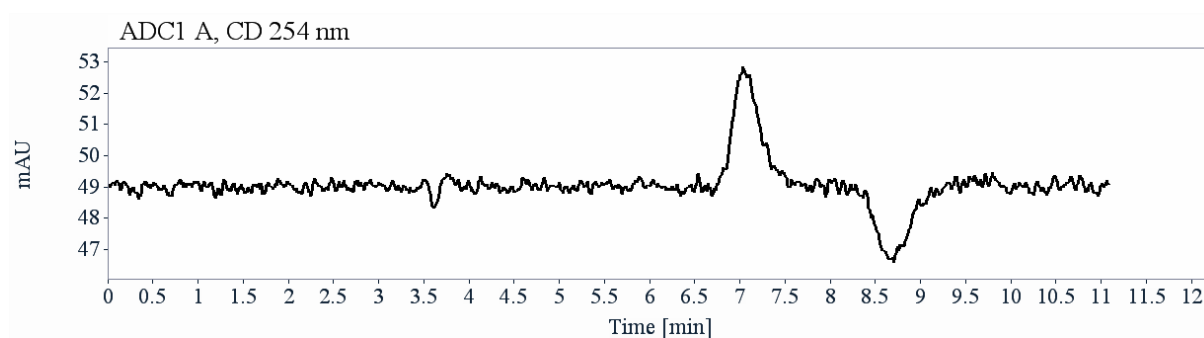

| RT [min] | Area | Area%  | Capacity Factor | Enantioselectivity | Resolution (USP) |
|----------|------|--------|-----------------|--------------------|------------------|
| 6.71     | 298  | 56.16  | 1.27            |                    |                  |
| 8.32     | 233  | 43.84  | 1.82            | 1.43               | 3.38             |
| Sum      | 531  | 100.00 |                 |                    |                  |

**- Determination of the enantiomeric excess of *M*-H<sub>6</sub>(DPP)<sub>2</sub>**

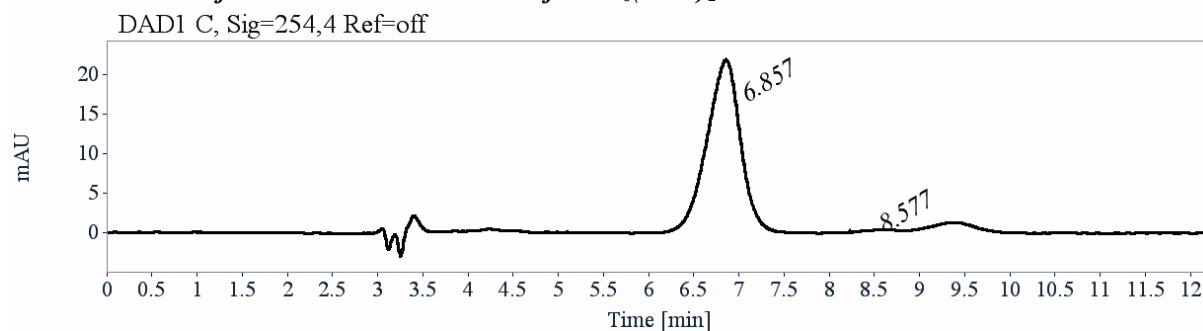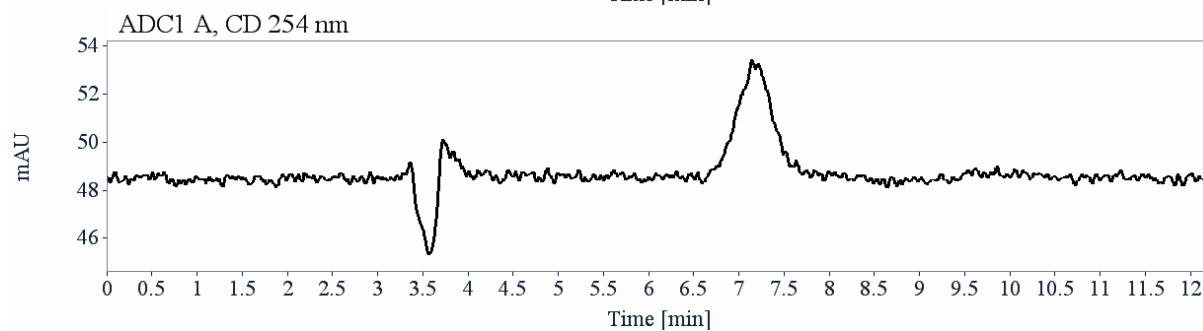

| RT [min] | Area | Area%  | Capacity Factor |
|----------|------|--------|-----------------|
| 6.86     | 570  | 97.54  | 1.32            |
| 8.58     | 14   | 2.46   | 1.91            |
| Sum      | 585  | 100.00 |                 |

**- Determination of the enantiomeric excess of *P*-H<sub>6</sub>(DPP)<sub>2</sub>**

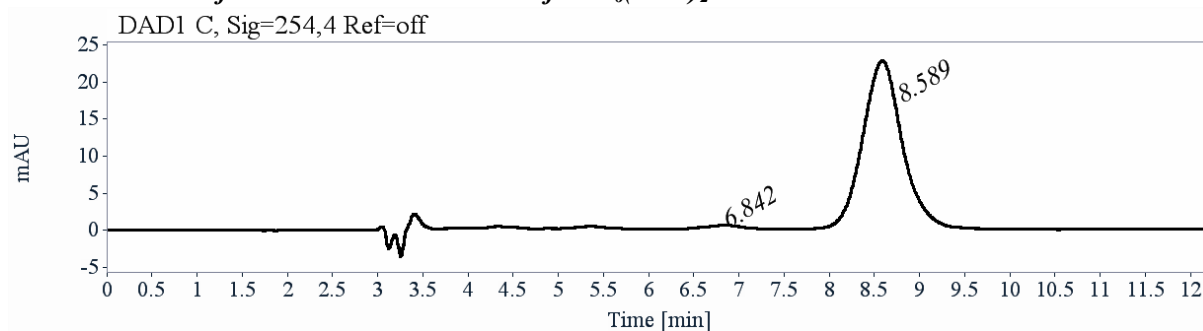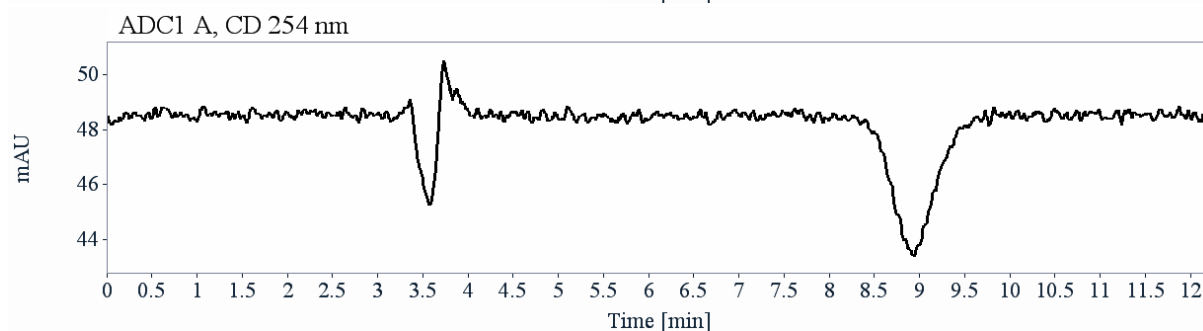

| RT [min] | Area | Area%  | Capacity Factor |
|----------|------|--------|-----------------|
| 6.84     | 16   | 2.20   | 1.32            |
| 8.59     | 705  | 97.80  | 1.91            |
| Sum      | 721  | 100.00 |                 |

### - Kinetics of enantiomerization of $H_6(DPP)_2$ in 1,2-dichloro-benzene

About 0.3 mg of  $P-H_6(DPP)_2$  is heated in about 25 mL of 1,2-dichlorobenzene at 182 °C. 20  $\mu$ L are taken and then injected on (Chiralpak ID (50:30:20 heptane / ethanol / dichloromethane, 1 mL/min, UV 290 nm). The percentage decrease of  $P-H_6(DPP)_2$  is monitored.

| Time (min) | % second eluted enantiomer | $\ln ((\%t-50\%)/(\%(t=0)-50\%))$ |
|------------|----------------------------|-----------------------------------|
| 0          | 97.61                      | 0.00000                           |
| 995        | 89.63                      | -0.18346                          |
| 1305       | 87.02                      | -0.25158                          |
| 1535       | 85.44                      | -0.29520                          |
| 2480       | 79.63                      | -0.47426                          |
| 2770       | 77.96                      | -0.53227                          |

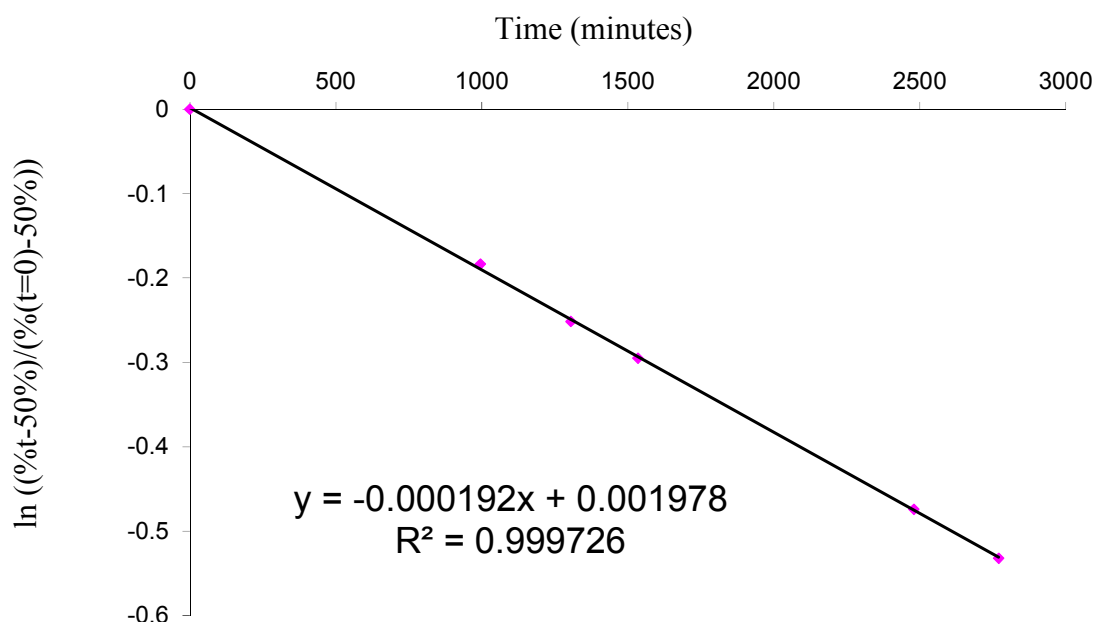

$$k_{\text{enantiomerisation}} = 1.6040E-06 \text{ s}^{-1} \text{ (182}^\circ\text{C, 1,2-dichlorobenzene)}$$

$$\Delta G^\ddagger = 163.6 \text{ kJ/mol (182}^\circ\text{C, 1,2-dichlorobenzene)}$$

$$t_{1/2} = 60 \text{ hours (182}^\circ\text{C, 1,2-dichlorobenzene)}$$

### References

- <sup>1.1</sup> C. Würth, M. Grabolle, J. Pauli, M. Spieles and U. Resch-Genger, *Nat. Protocols*, 2013, **8**, 1535.
- <sup>1.2</sup> E. Anger, M. Srebro, N. Vanthuyne, L. Toupet, S. Rigaut, C. Roussel, C.; J. Autschbach, J. Crassous, R. Réau, *J. Am. Chem. Soc.* 2012, **134**, 15628.
- <sup>1.3</sup> M. Jung, Y. Yoon, J. H. Park, W. Cha, A. Kim, J. Kang, S. Gautam, D. Seo, J. H. Cho, H. Kim, J. Y. Choi, K. H. Chae, K. Kwak, H. J. Son, M. J.; Ko, H. Kim, D.-K.; Lee, J. Y. Kim, D. H.; Choi, B. Kim, *ACS Nano*, 2014, **8**, 5988.

<sup>1.4</sup> M. Grzybowski, D. T. Gryko, *Adv. Opt. Mater.*, 2015, **3**, 280.

<sup>1.5</sup> (a) C. M. Cardona, W. Li, A. E. Kaifer, D. Stockdale, G. C. Bazan, *Adv. Mater.*, **2011**, **23**, 2367, (b) A. J. Bard, L. R. Faulkner, *Electrochemical Methods: Fundamentals and Applications*, Wiley, New York, 2001.

## 2. Computational part

### Computational details

Computations were performed for **DPPBr** and **H6(TMS)<sub>2</sub>** reference systems and truncated models of helicene-DPP derivatives **H6DPP** and **H6(DPP)<sub>2</sub>** with *n*-octyl groups replaced by methyls.

All calculations were carried out with the Turbomole package (TM6.6),<sup>2.1</sup> and, where specifically stated, with the Gaussian 09 program (G09),<sup>2.2</sup> using Kohn-Sham (KS) density functional theory (KST, or DFT) and its time-dependent variant (TDKS, or TDDFT).<sup>2.3</sup> Geometry optimizations were performed using the BP<sup>2.4</sup> exchange-correlation functional and a split-valence basis set with one set of polarization functions for non-hydrogen atoms, SV(P).<sup>2.5</sup> TDDFT linear response calculations of singlet excitation energies as well as the associated dipole and rotatory strengths were carried out with BHLYP<sup>2.6</sup>/SV(P). Solvent effects (dichloromethane, DCM,  $\epsilon = 8.9$ ) were included in the calculations via the conductor-like screening model (COSMO) with the default parameters of the TM6.6/COSMO implementation.<sup>2.7</sup>

The TDDFT calculations reported here cover up to 150 lowest singlet excited states to assure that all transitions with a significant rotatory strength in the experimentally observed energy range are included. The simulated absorption and electronic circular dichroism (ECD) spectra shown are the sums of Gaussian functions centered at the vertical excitation energies and scaled using the calculated dipole and rotatory strengths, with a parameter of  $\sigma = 0.2$  eV applied for the root mean square width.<sup>2.8</sup>

Additional ECD calculations were performed on a (DPPBr)<sub>2</sub> dimer model, with the two DPP moieties in the same relative positions as adopted by the substituents in **H6(DPP)<sub>2</sub>** as well as (DPP-alkynyl)<sub>2</sub> and (DPP-alkynyl-Ph)<sub>2</sub> dimer models including the alkynyl group and the alkynyl with the first phenyl group of the helicene, respectively (see Figure S2.12). The dangling bonds were saturated with bromine or hydrogen atoms whose positions were optimized with BP/SV(P). The ECD computations utilized BHLYP and a functional based on PBE0<sup>2.9</sup> with range-separated exchange and correct asymptotic behavior (long-range correction = LC).<sup>2.10</sup> The LC-PBE0 parametrization afforded 25% of exact exchange in the short-range limit and employed an error-function range-separation with a separation parameter  $\gamma$  of  $0.30 \text{ a}_0^{-1}$ . These calculations were performed with G09. The polarizable continuum model (PCM)<sup>2.11</sup> was used here to simulate the solvent (DCM) effects.

## Additional computational results

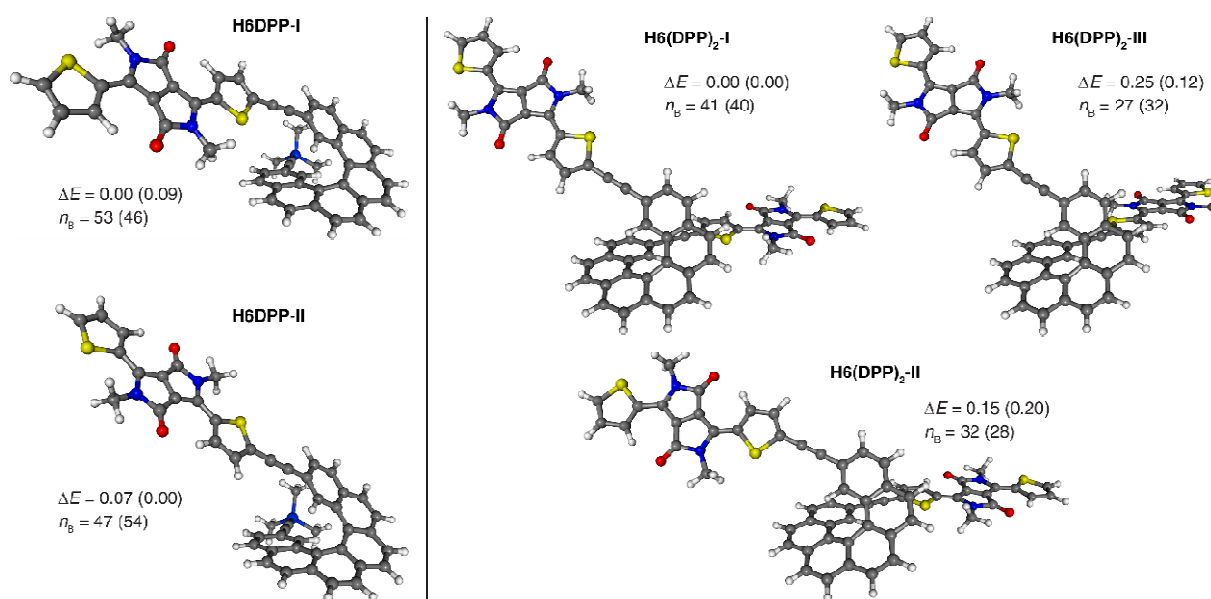

**Figure S2.1.** Selected low-energy structures of helicene-DPP derivatives **H6DPP** (left) and **H6(DPP)<sub>2</sub>** (right).  $\Delta E$  and  $n_B$  values are, respectively, relative energies (in kcal/mol) and the corresponding Boltzmann populations (in %) for geometries optimized using BP/SV(P) with continuum solvent model for  $\text{CH}_2\text{Cl}_2$  (displayed); in parentheses are given  $\Delta E$  for BP/SV(P) geometries optimized without the solvent model.

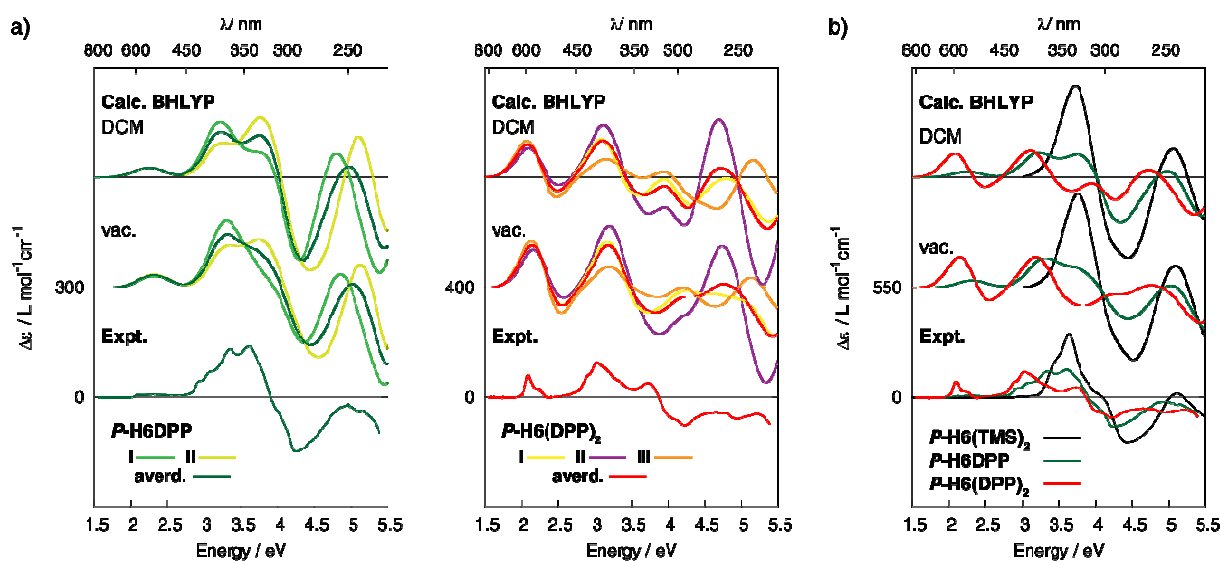

**Figure S2.2.** Comparison of the experimental and calculated TDDFT ECD spectra of helicene-DPP derivatives with helicene-TMS system used as a reference. No spectral shift has been applied. ‘vac.’ / ‘DCM’ indicates calculations without / with continuum solvent model (dichloromethane,  $\epsilon = 8.9$ ). Panel a: Numbers listed (I, II, III) correspond to different **H6DPP** and **H6(DPP)<sub>2</sub>** conformers (see Figure S2.1). ‘averd.’ indicates a Boltzmann-averaged (25°C) spectrum. Panel b: simulated spectra correspond to Boltzmann-averaged (25°C) spectra from panel a.

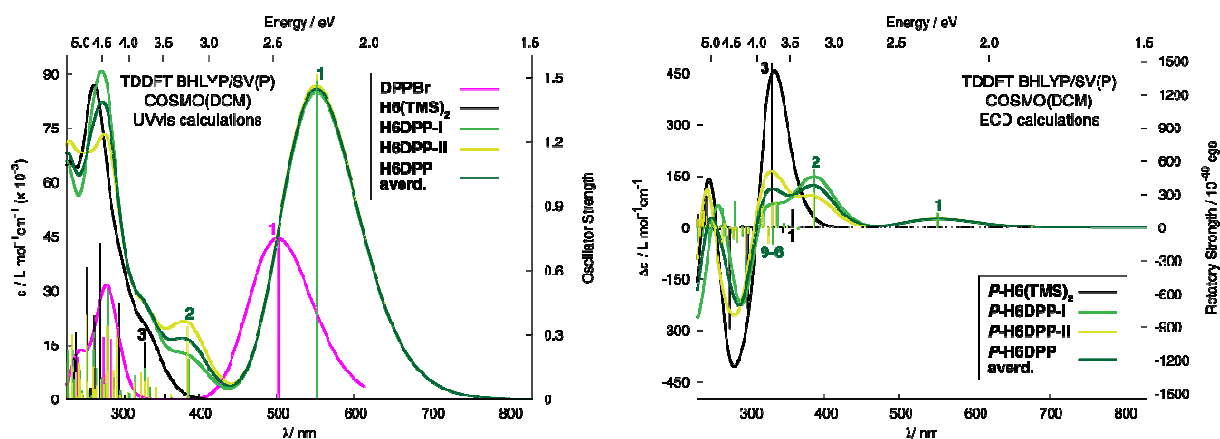

**Figure S2.3.** Comparison of the simulated UVvis (left) and ECD (right) spectra of **H6DPP** with **H6(TMS)<sub>2</sub>** and **DPPBr** used as a reference. No spectral shift has been applied. Calculated excitation energies and rotatory strengths indicated as ‘stick’ spectra. Numbered excitations correspond to those analyzed in detail. ‘avard.’ indicates a Boltzmann-averaged (25°C) spectrum.

**Table S2.1.** Selected dominant excitations and occupied (occ) – unoccupied (unocc) MO pair contributions (greater than 10%) of the *P*-**H6(TMS)<sub>2</sub>**.

| Excitation | $E / \text{eV}$ | $\lambda / \text{nm}$ | $f$   | $R / 10^{-40}$ cgs | occ no. | unocc no. | %    |
|------------|-----------------|-----------------------|-------|--------------------|---------|-----------|------|
| 1          | 3.47            | 357                   | 0.025 | 159.37             | 138     | 139       | 64.7 |
|            |                 |                       |       |                    | 137     | 140       | 20.5 |
| 3          | 3.75            | 330                   | 0.267 | 1477.02            | 137     | 140       | 62.5 |
|            |                 |                       |       |                    | 138     | 139       | 24.1 |

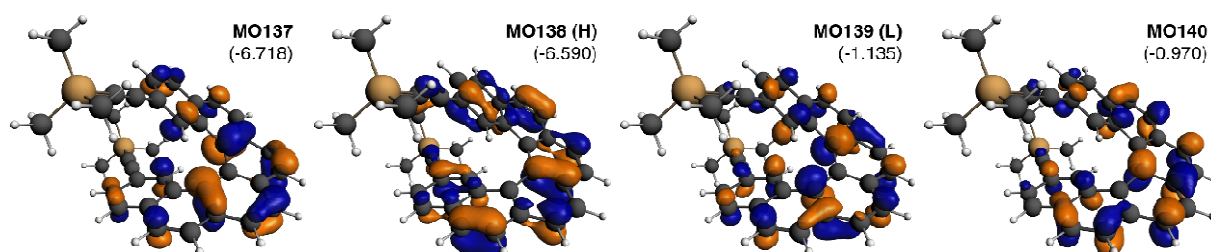

**Figure S2.4.** Isosurfaces ( $\pm 0.04$  au) of MOs involved in selected transitions of *P*-**H6(TMS)<sub>2</sub>**. ‘H’ = HOMO, ‘L’ = LUMO. Values listed in the parentheses are the corresponding orbital energies, in eV.

**Table S2.2.** Selected dominant excitations and occupied (occ) – unoccupied (unocc) MO pair contributions (greater than 10%) of the **DPPBr**.

| Excitation | $E / \text{eV}$ | $\lambda / \text{nm}$ | $f$   | occ no. | unocc no. | %    |
|------------|-----------------|-----------------------|-------|---------|-----------|------|
| 1          | 2.47            | 502                   | 0.779 | 102     | 103       | 98.3 |

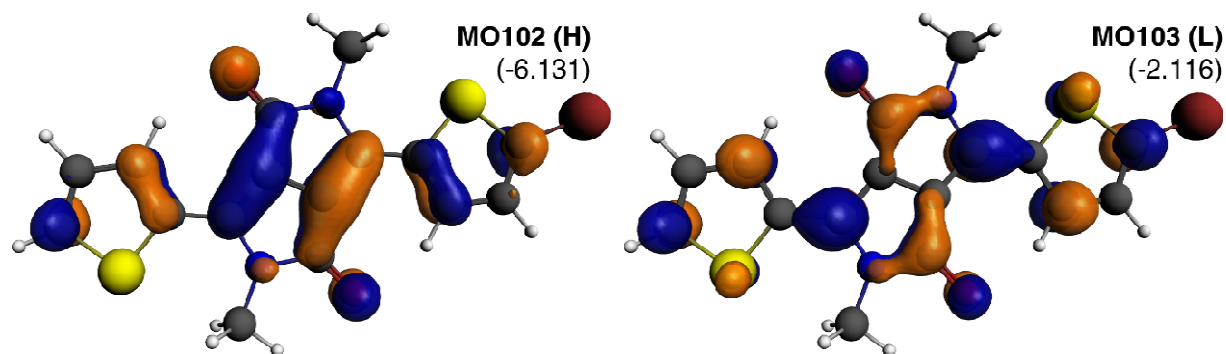

**Figure S2.5.** Isosurfaces ( $\pm 0.04$  au) of MOs involved in selected transitions of **DPPBr**. ‘H’ = HOMO, ‘L’ = LUMO. Values listed in the parentheses are the corresponding orbital energies, in eV.

**Table S2.3.** Selected dominant excitations and occupied (occ) – unoccupied (unocc) MO pair contributions (greater than 10%) of the **P-H6DPP-I**.

| Excitation | $E / \text{eV}$ | $\lambda / \text{nm}$ | $f$   | $R / 10^{-40}$ cgs | occ no. | unocc no. | %    |
|------------|-----------------|-----------------------|-------|--------------------|---------|-----------|------|
| 1          | 2.25            | 552                   | 1.483 | 130.73             | 202     | 203       | 95.4 |
|            |                 |                       |       |                    | 201     | 204       | 0.86 |
|            |                 |                       |       |                    | 199     | 204       | 0.52 |
| 2          | 3.20            | 387                   | 0.189 | 532.45             | 201     | 203       | 42.1 |
|            |                 |                       |       |                    | 202     | 204       | 13.1 |
|            |                 |                       |       |                    | 199     | 203       | 12.7 |
| 6          | 3.67            | 337                   | 0.060 | 201.48             | 201     | 205       | 26.2 |
|            |                 |                       |       |                    | 200     | 203       | 23.7 |
|            |                 |                       |       |                    | 201     | 203       | 14.1 |
|            |                 |                       |       |                    | 202     | 205       | 10.1 |
| 7          | 3.75            | 331                   | 0.147 | -145.71            | 199     | 203       | 30.0 |
|            |                 |                       |       |                    | 195     | 203       | 15.9 |
|            |                 |                       |       |                    | 200     | 205       | 13.3 |
| 8          | 3.81            | 326                   | 0.084 | -83.82             | 195     | 203       | 32.1 |
|            |                 |                       |       |                    | 196     | 203       | 22.7 |
|            |                 |                       |       |                    | 199     | 203       | 18.5 |
| 9          | 3.91            | 317                   | 0.113 | 223.36             | 200     | 206       | 19.6 |
|            |                 |                       |       |                    | 202     | 206       | 14.0 |
|            |                 |                       |       |                    | 200     | 204       | 10.6 |

**Table S2.4.** Selected dominant excitations and occupied (occ) – unoccupied (unocc) MO pair contributions (greater than 10%) of the *P-H6DPP-II*.

| Excitation | $E / \text{eV}$ | $\lambda / \text{nm}$ | $f$   | $R / 10^{-40} \text{ cgs}$ | occ no. | unocc no. | %    |
|------------|-----------------|-----------------------|-------|----------------------------|---------|-----------|------|
| 1          | 2.25            | 552                   | 1.513 | 136.64                     | 202     | 203       | 95.3 |
|            |                 |                       |       |                            | 201     | 204       | 0.91 |
|            |                 |                       |       |                            | 199     | 204       | 0.54 |
| 2          | 3.21            | 386                   | 0.340 | 321.99                     | 201     | 203       | 42.2 |
|            |                 |                       |       |                            | 202     | 204       | 13.5 |
|            |                 |                       |       |                            | 199     | 203       | 13.3 |
| 6          | 3.70            | 335                   | 0.102 | 237.57                     | 201     | 205       | 27.9 |
|            |                 |                       |       |                            | 200     | 203       | 27.8 |
|            |                 |                       |       |                            | 201     | 203       | 11.8 |
| 7          | 3.75            | 330                   | 0.082 | 201.30                     | 199     | 203       | 25.2 |
|            |                 |                       |       |                            | 195     | 203       | 20.8 |
|            |                 |                       |       |                            | 196     | 203       | 12.5 |
|            |                 |                       |       |                            | 200     | 205       | 12.0 |
| 8          | 3.81            | 326                   | 0.122 | -133.34                    | 195     | 203       | 27.3 |
|            |                 |                       |       |                            | 199     | 203       | 23.0 |
|            |                 |                       |       |                            | 196     | 203       | 20.4 |
| 9          | 3.92            | 316                   | 0.079 | 217.45                     | 200     | 206       | 20.6 |
|            |                 |                       |       |                            | 202     | 206       | 12.9 |



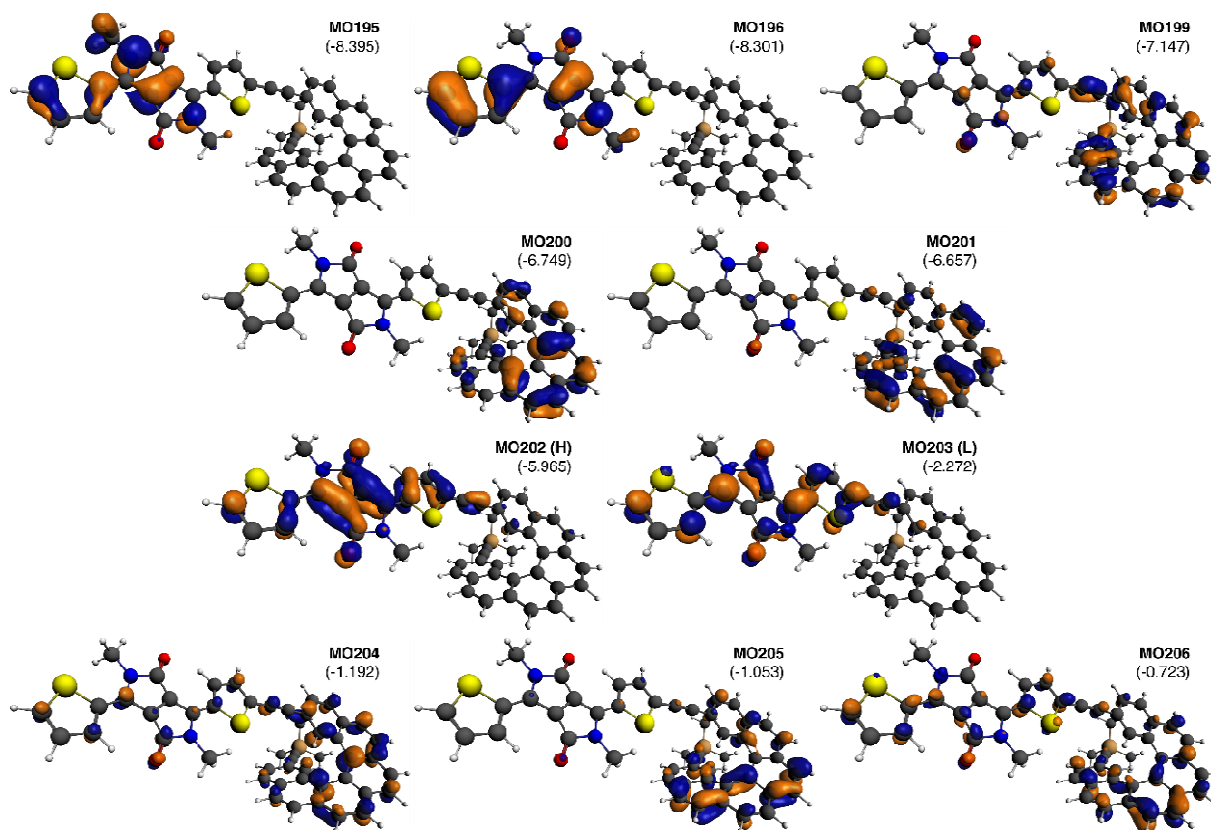

**Figure S2.6.** Isosurfaces ( $\pm 0.04$  au) of MOs involved in selected transitions of *P*-H6DPP-I. ‘H’ = HOMO, ‘L’ = LUMO. Values listed in the parentheses are the corresponding orbital energies, in eV.

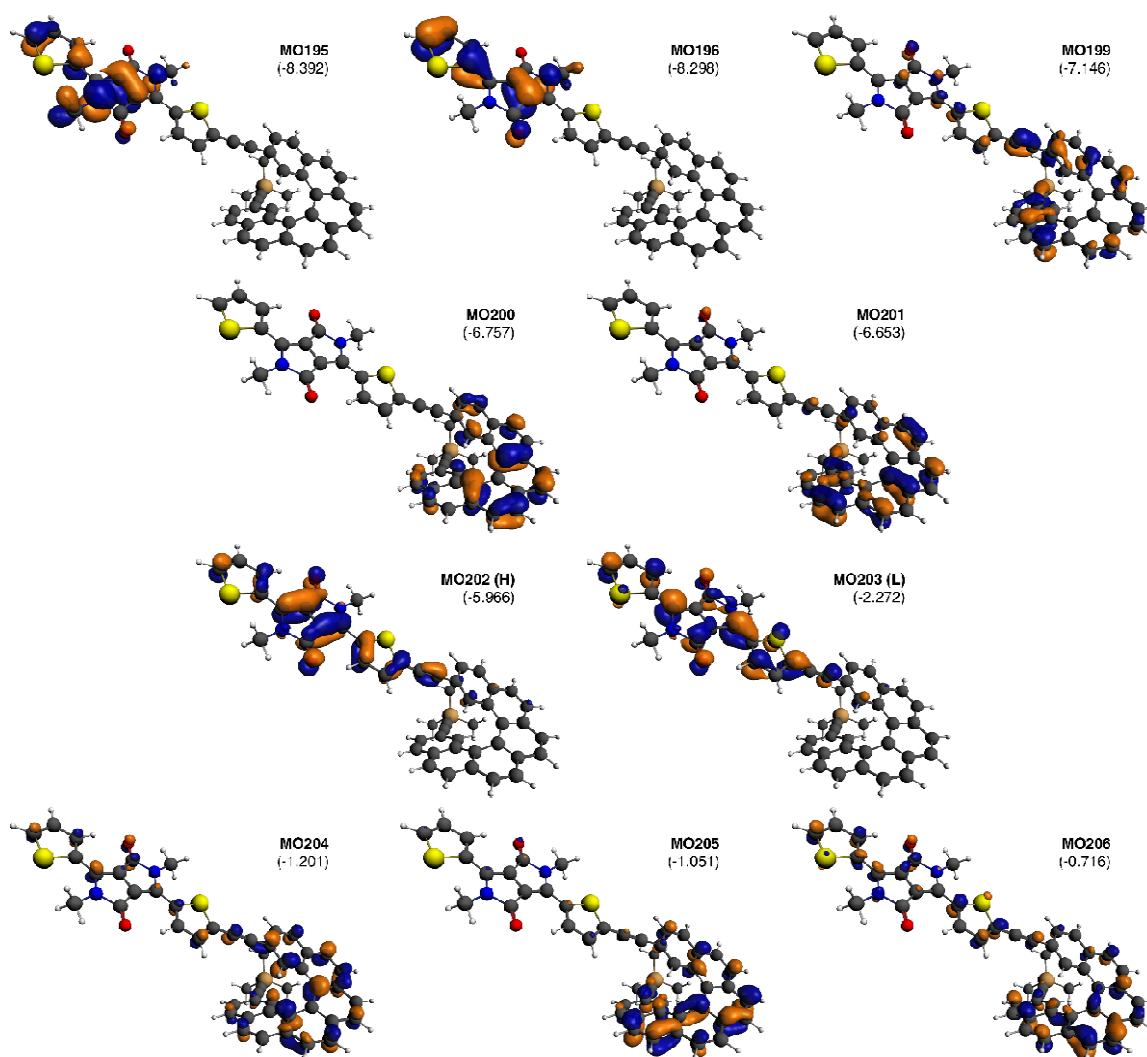

**Figure S2.7.** Isosurfaces ( $\pm 0.04$  au) of MOs involved in selected transitions of *P*-H6DPP-II. ‘H’ = HOMO, ‘L’ = LUMO. Values listed in the parentheses are the corresponding orbital energies, in eV.

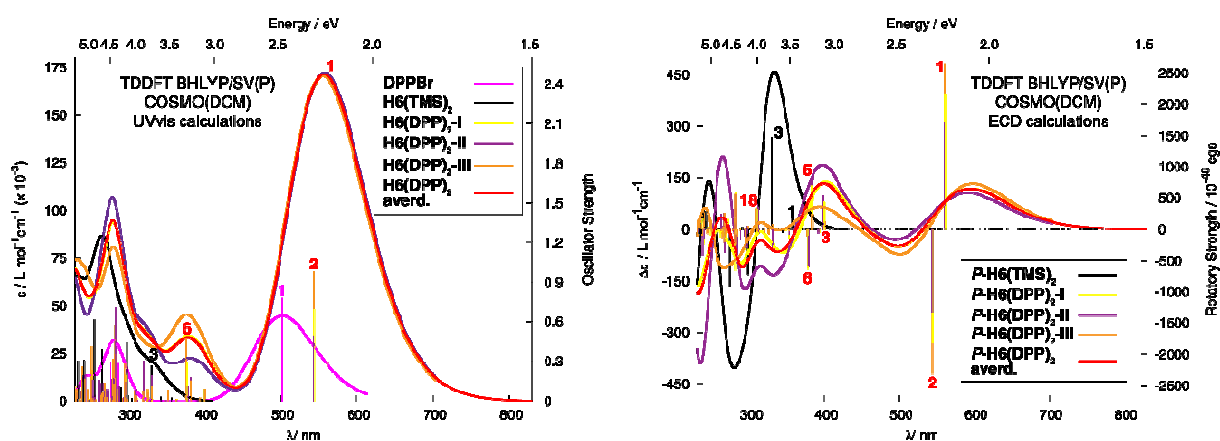

**Figure S2.8.** Comparison of the simulated UVvis (left) and ECD (right) spectra of **H6(DPP)<sub>2</sub>** with **H6(TMS)<sub>2</sub>** and **DPPBr** used as a reference. No spectral shift has been applied. Calculated excitation energies and rotatory strengths indicated as ‘stick’ spectra. Numbered excitations correspond to those analyzed in detail. ‘averd.’ indicates a Boltzmann-averaged (25°C) spectrum.

**Table S2.5.** Selected dominant excitations and occupied (occ) – unoccupied (unocc) MO pair contributions (greater than 10%) of the *P-H6(DPP)<sub>2</sub>-I*. See also Table S2.8.

| Excitation | $E / \text{eV}$ | $\lambda / \text{nm}$ | $f$   | $R / 10^{-40} \text{ cgs}$ | occ no. | unocc no. | %    |
|------------|-----------------|-----------------------|-------|----------------------------|---------|-----------|------|
| 1          | 2.21            | 561                   | 2.316 | 2180.80                    | 266     | 267       | 51.0 |
|            |                 |                       |       |                            | 265     | 268       | 43.9 |
| 2          | 2.28            | 544                   | 0.695 | -1820.38                   | 265     | 267       | 47.7 |
|            |                 |                       |       |                            | 266     | 268       | 47.6 |
| 3          | 3.10            | 400                   | 0.089 | 438.52                     | 265     | 268       | 28.2 |
|            |                 |                       |       |                            | 264     | 267       | 24.5 |
|            |                 |                       |       |                            | 266     | 267       | 23.3 |
| 5          | 3.24            | 382                   | 0.169 | 702.33                     | 265     | 268       | 19.4 |
|            |                 |                       |       |                            | 266     | 267       | 19.3 |
|            |                 |                       |       |                            | 264     | 267       | 17.5 |
|            |                 |                       |       |                            | 262     | 268       | 11.5 |
| 6          | 3.29            | 377                   | 0.298 | -641.88                    | 264     | 268       | 29.0 |
|            |                 |                       |       |                            | 262     | 267       | 15.2 |
|            |                 |                       |       |                            | 263     | 267       | 13.5 |
| 18         | 4.00            | 310                   | 0.080 | 350.90                     | 263     | 270       | 20.3 |
|            |                 |                       |       |                            | 263     | 268       | 15.9 |
|            |                 |                       |       |                            | 265     | 272       | 13.3 |
|            |                 |                       |       |                            | 263     | 272       | 11.7 |

**Table S2.6.** Selected dominant excitations and occupied (occ) – unoccupied (unocc) MO pair contributions (greater than 10%) of the *P-H6(DPP)<sub>2</sub>-II*. See also Table S2.9.

| Excitation | $E / \text{eV}$ | $\lambda / \text{nm}$ | $f$   | $R / 10^{-40} \text{ cgs}$ | occ no. | unocc no. | %    |
|------------|-----------------|-----------------------|-------|----------------------------|---------|-----------|------|
| 1          | 2.21            | 561                   | 2.531 | 1708.48                    | 266     | 267       | 50.7 |
|            |                 |                       |       |                            | 265     | 268       | 44.4 |
| 2          | 2.28            | 543                   | 0.493 | -1331.97                   | 266     | 268       | 47.7 |
|            |                 |                       |       |                            | 265     | 267       | 47.7 |
| 3          | 3.11            | 398                   | 0.091 | 541.66                     | 265     | 268       | 27.2 |
|            |                 |                       |       |                            | 264     | 267       | 26.0 |
|            |                 |                       |       |                            | 266     | 267       | 22.4 |
| 5          | 3.24            | 382                   | 0.178 | 794.14                     | 265     | 268       | 19.1 |
|            |                 |                       |       |                            | 266     | 267       | 19.1 |
|            |                 |                       |       |                            | 264     | 267       | 15.3 |
|            |                 |                       |       |                            | 263     | 268       | 11.8 |

|    |      |     |       |         |     |     |      |
|----|------|-----|-------|---------|-----|-----|------|
|    |      |     |       |         | 262 | 268 | 11.0 |
| 6  | 3.28 | 378 | 0.111 | -596.00 | 264 | 268 | 26.9 |
|    |      |     |       |         | 263 | 267 | 15.4 |
|    |      |     |       |         | 262 | 267 | 14.8 |
| 18 | 3.99 | 311 | 0.087 | 406.16  | 263 | 270 | 21.0 |
|    |      |     |       |         | 265 | 272 | 14.5 |
|    |      |     |       |         | 263 | 268 | 13.7 |
|    |      |     |       |         | 263 | 272 | 11.2 |

**Table S2.7.** Selected dominant excitations and occupied (occ) – unoccupied (unocc) MO pair contributions (greater than 10%) of the *P*-**H6(DPP)<sub>2</sub>-III**. See also Table S2.10.

| Excitation | <i>E</i> / eV | $\lambda$ / nm | <i>f</i> | <i>R</i> / 10 <sup>-40</sup> cgs | occ no. | unocc no. | %    |
|------------|---------------|----------------|----------|----------------------------------|---------|-----------|------|
| 1          | 2.21          | 561            | 2.031    | 2657.21                          | 266     | 267       | 51.4 |
|            |               |                |          |                                  | 265     | 268       | 43.9 |
| 2          | 2.28          | 544            | 0.980    | -2319.67                         | 265     | 267       | 47.7 |
|            |               |                |          |                                  | 266     | 268       | 47.6 |
| 3          | 3.10          | 401            | 0.090    | 122.34                           | 265     | 268       | 30.1 |
|            |               |                |          |                                  | 266     | 267       | 23.9 |
| 5          | 3.24          | 382            | 0.156    | 243.01                           | 265     | 268       | 19.7 |
|            |               |                |          |                                  | 266     | 267       | 19.5 |
|            |               |                |          |                                  | 264     | 267       | 19.5 |
|            |               |                |          |                                  | 262     | 268       | 11.9 |
| 6          | 3.30          | 376            | 0.489    | -104.72                          | 264     | 268       | 30.7 |
|            |               |                |          |                                  | 262     | 267       | 15.8 |
|            |               |                |          |                                  | 263     | 267       | 11.9 |
| 18         | 4.02          | 309            | 0.076    | 336.46                           | 263     | 270       | 20.7 |
|            |               |                |          |                                  | 263     | 268       | 19.0 |
|            |               |                |          |                                  | 265     | 272       | 12.9 |
|            |               |                |          |                                  | 263     | 272       | 12.7 |

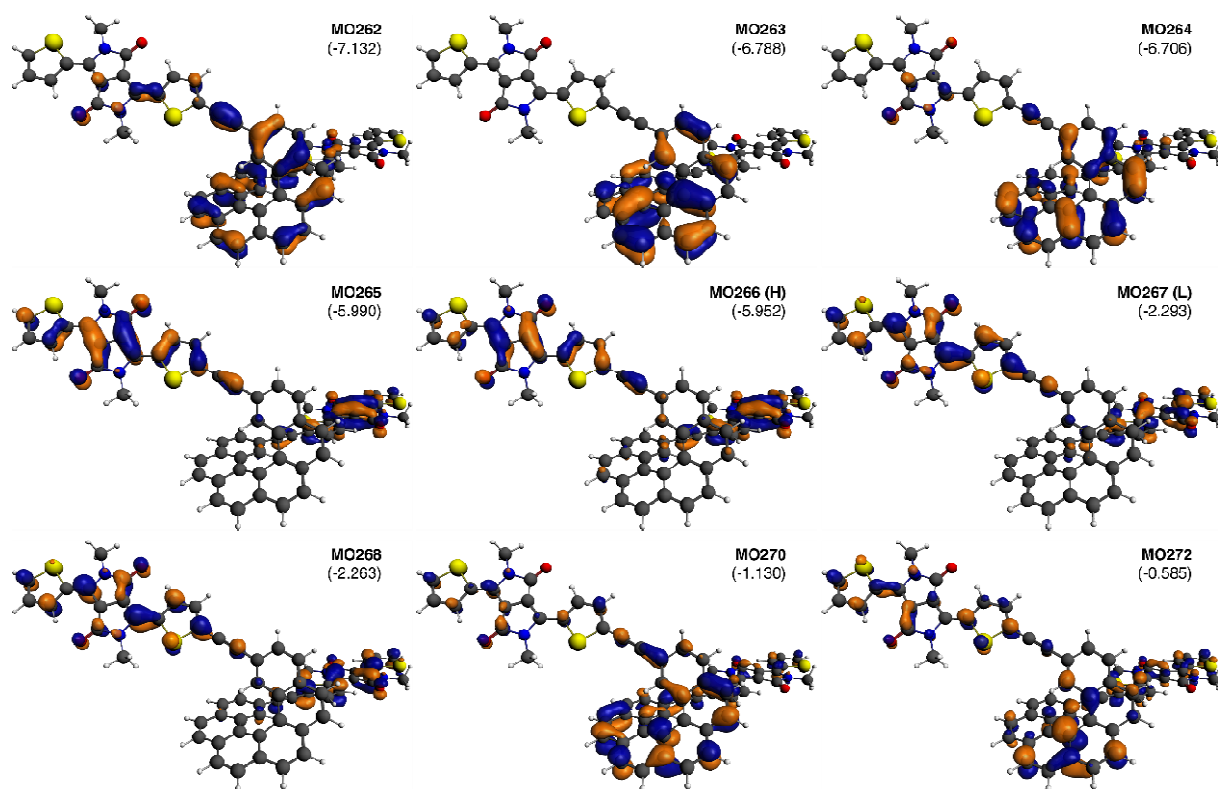

**Figure S2.9.** Isosurfaces ( $\pm 0.03$  au) of MOs involved in selected transitions of  $P\text{-H6(DPP)}_2\text{-I}$ . 'H' = HOMO, 'L' = LUMO. Values listed in the parentheses are the corresponding orbital energies, in eV.

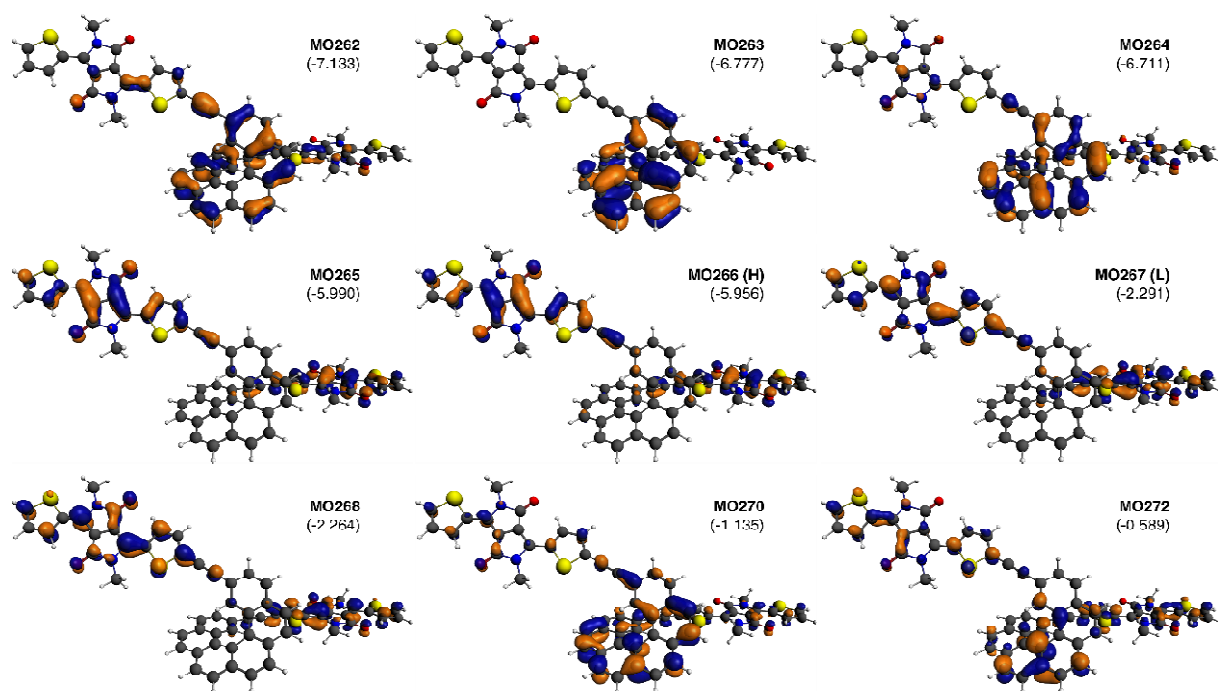

**Figure S2.10.** Isosurfaces ( $\pm 0.03$  au) of MOs involved in selected transitions of  $P\text{-H6(DPP)}_2\text{-II}$ . 'H' = HOMO, 'L' = LUMO. Values listed in the parentheses are the corresponding orbital energies, in eV.

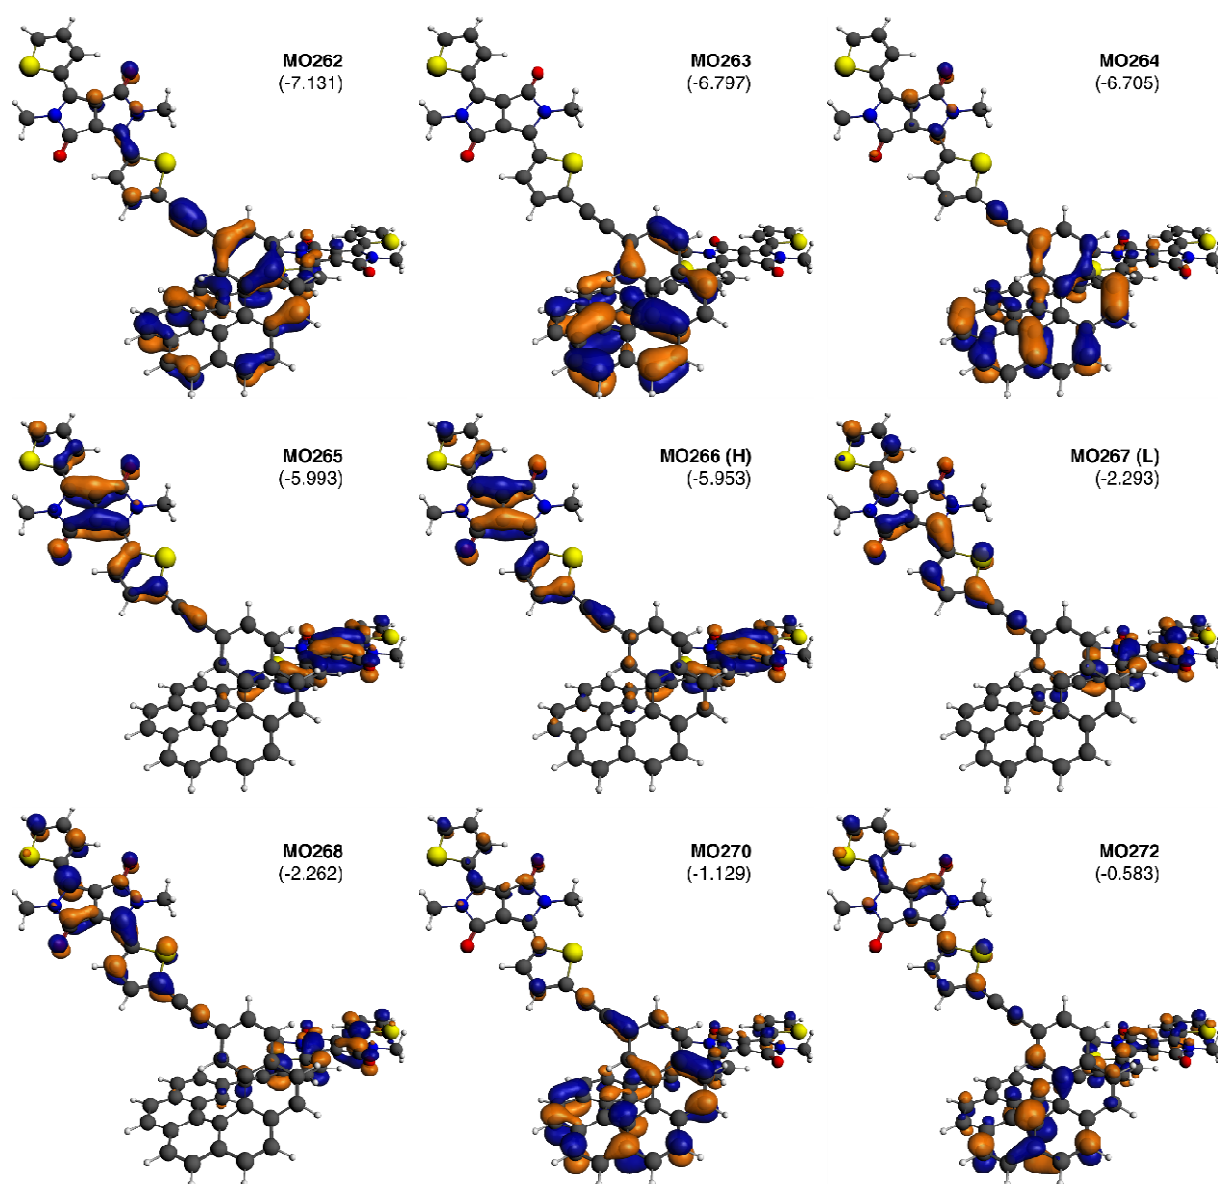

**Figure S2.11.** Isosurfaces ( $\pm 0.03$  au) of MOs involved in selected transitions of *P*-H6(DPP)<sub>2</sub>-III. ‘H’ = HOMO, ‘L’ = LUMO. Values listed in the parentheses are the corresponding orbital energies, in eV.

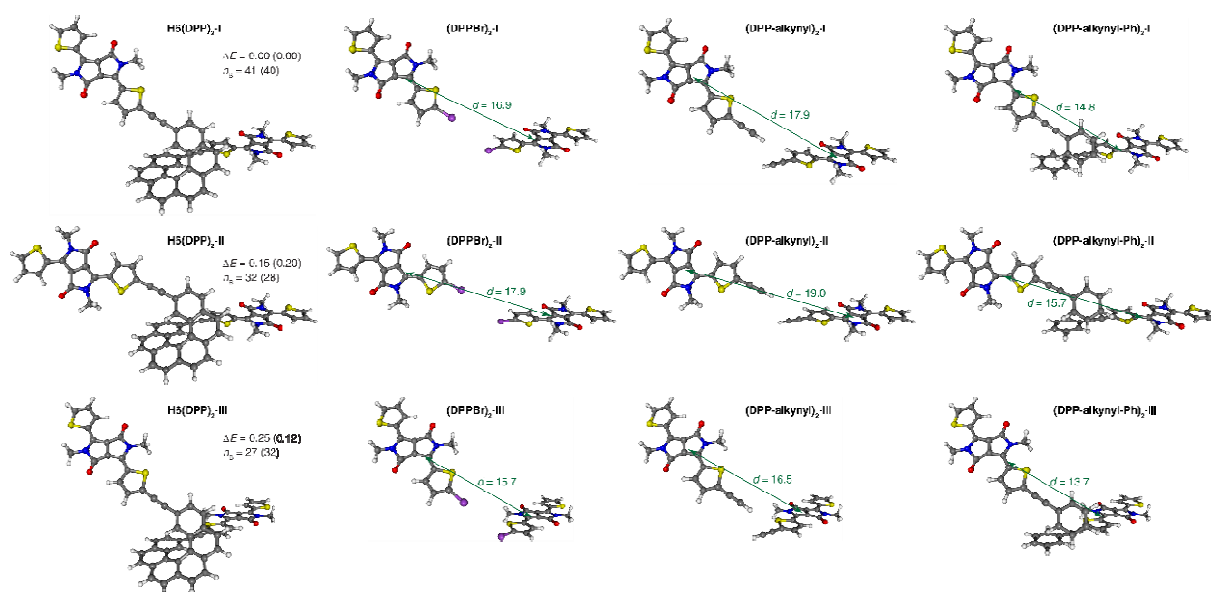

**Figure S2.12.** Selected low-energy structures of **H6(DPP)<sub>2</sub>** derivatives and the corresponding **(DPPBr)<sub>2</sub>**, **(DPP-alkynyl)<sub>2</sub>** and **(DPP-alkynyl-Ph)<sub>2</sub>** dimer models.  $\Delta E$  and  $n_B$  values listed for **H6(DPP)<sub>2</sub>** complexes are, respectively, relative energies (in kcal/mol) and the corresponding Boltzmann populations (in %) for geometries optimized using BP/SV(P) with continuum solvent model for CH<sub>2</sub>Cl<sub>2</sub> (displayed); in parentheses are given  $\Delta E$  for BP/SV(P) geometries optimized without the solvent model. For dimer models, a distance between centers of nuclear charge of both chromophores ( $d$ , in Å) is given.

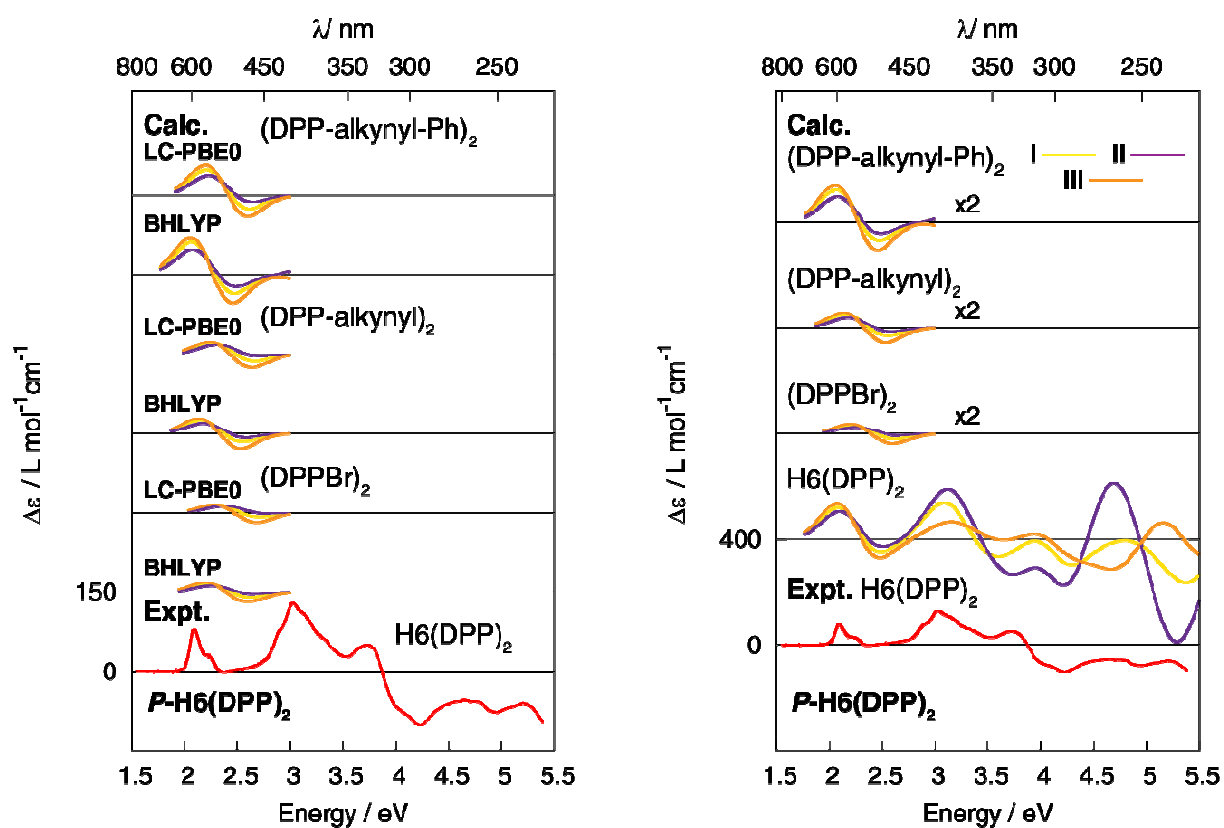

**Figure S2.13.** Right: Comparison of the experimental ECD spectrum of **H6(DPP)<sub>2</sub>** and calculated (TDDFT with continuum solvent model for dichloromethane) ECD spectra (limited to low-energy

region, < 3 eV) of the corresponding dimer models (see Figure S2.12). Left: Comparison of the experimental and simulated (TDDFT BHLYP) ECD spectra of **H6(DPP)<sub>2</sub>** derivatives and the corresponding dimer models. Intensity of the simulated ECD spectra of dimer systems has been scaled by a factor of 2 for visual clarity. Numbers listed (I, II, III) correspond to different conformers examined. No spectral shift has been applied.

**Table S2.8.** Lowest-energy excitations and occupied (occ) – unoccupied (unocc) MO pair contributions of the *P*-**H6(DPP)<sub>2</sub>-I** and the corresponding **(DPPBr)<sub>2</sub>-I** and **(DPP-alkynyl-Ph)<sub>2</sub>-I**. BHLYP DCM calculations. See Figure S2.14.

| Excitation                            | <i>E</i> / eV | $\lambda$ / nm | <i>f</i> | <i>R</i> / 10 <sup>-40</sup> cgs | occ no. | unocc no. | %    |
|---------------------------------------|---------------|----------------|----------|----------------------------------|---------|-----------|------|
| <b>H6(DPP)<sub>2</sub>-I</b>          |               |                |          |                                  |         |           |      |
| 1                                     | 2.21          | 561            | 2.316    | 2180.80                          | 266     | 267       | 51.0 |
|                                       |               |                |          |                                  | 265     | 268       | 43.9 |
|                                       |               |                |          |                                  | 264     | 269       | 1.28 |
|                                       |               |                |          |                                  | 262     | 270       | 0.64 |
| 2                                     | 2.28          | 544            | 0.695    | -1820.38                         | 265     | 267       | 47.7 |
|                                       |               |                |          |                                  | 266     | 268       | 47.6 |
|                                       |               |                |          |                                  | 264     | 270       | 0.90 |
|                                       |               |                |          |                                  | 262     | 269       | 0.62 |
|                                       |               |                |          |                                  | 264     | 268       | 0.61 |
| <b>(DPPBr)<sub>2</sub>-I</b>          |               |                |          |                                  |         |           |      |
| 1                                     | 2.39          | 519            | 1.378    | 990.61                           | 203     | 205       | 48.9 |
|                                       |               |                |          |                                  | 204     | 206       | 50.3 |
| 2                                     | 2.41          | 514            | 0.325    | -962.01                          | 203     | 205       | 50.3 |
|                                       |               |                |          |                                  | 204     | 206       | 48.9 |
| <b>(DPP-alkynyl-Ph)<sub>2</sub>-I</b> |               |                |          |                                  |         |           |      |
| 1                                     | 2.21          | 560            | 2.275    | 1580.52                          | 222     | 223       | 50.7 |
|                                       |               |                |          |                                  | 221     | 224       | 46.0 |
| 2                                     | 2.27          | 547            | 0.507    | -1429.97                         | 221     | 223       | 49.1 |
|                                       |               |                |          |                                  | 222     | 224       | 47.6 |



**Table S2.9.** Lowest-energy excitations and occupied (occ) – unoccupied (unocc) MO pair contributions of the *P*-**H6(DPP)<sub>2</sub>-II** and the corresponding **(DPPBr)<sub>2</sub>-II** and **(DPP-alkynyl-Ph)<sub>2</sub>-II**. BHLYP DCM calculations. See Figure S2.14.

| Excitation                             | <i>E</i> / eV | $\lambda$ / nm | <i>f</i> | <i>R</i> / 10 <sup>-40</sup> cgs | occ no. | unocc no. | %    |
|----------------------------------------|---------------|----------------|----------|----------------------------------|---------|-----------|------|
| <b>H6(DPP)<sub>2</sub>-II</b>          |               |                |          |                                  |         |           |      |
| 1                                      | 2.21          | 561            | 2.531    | 1708.48                          | 266     | 267       | 50.7 |
|                                        |               |                |          |                                  | 265     | 268       | 44.4 |
|                                        |               |                |          |                                  | 264     | 269       | 1.22 |
|                                        |               |                |          |                                  | 262     | 270       | 0.63 |
| 2                                      | 2.28          | 543            | 0.493    | -1331.97                         | 266     | 268       | 47.7 |
|                                        |               |                |          |                                  | 265     | 267       | 47.7 |
|                                        |               |                |          |                                  | 264     | 270       | 0.89 |
|                                        |               |                |          |                                  | 262     | 269       | 0.59 |
|                                        |               |                |          |                                  | 264     | 268       | 0.57 |
| <b>(DPPBr)<sub>2</sub>-II</b>          |               |                |          |                                  |         |           |      |
| 1                                      | 2.39          | 518            | 1.453    | 607.89                           | 203     | 205       | 49.4 |
|                                        |               |                |          |                                  | 204     | 206       | 49.7 |
| 2                                      | 2.41          | 514            | 0.257    | -571.33                          | 203     | 205       | 49.8 |
|                                        |               |                |          |                                  | 204     | 206       | 49.4 |
| <b>(DPP-alkynyl-Ph)<sub>2</sub>-II</b> |               |                |          |                                  |         |           |      |
| 1                                      | 2.21          | 560            | 2.467    | 1116.38                          | 222     | 223       | 50.5 |
|                                        |               |                |          |                                  | 221     | 224       | 46.2 |
| 2                                      | 2.27          | 546            | 0.347    | -976.42                          | 221     | 223       | 49.3 |
|                                        |               |                |          |                                  | 222     | 224       | 48.4 |

**Table S2.10.** Lowest-energy excitations and occupied (occ) – unoccupied (unocc) MO pair contributions of the *P*-**H6(DPP)<sub>2</sub>-III** and the corresponding **(DPPBr)<sub>2</sub>-III** and **(DPP-alkynyl-Ph)<sub>2</sub>-III**. BHLYP DCM calculations. See Figure S2.14.

| Excitation                              | <i>E</i> / eV | $\lambda$ / nm | <i>f</i> | <i>R</i> / 10 <sup>-40</sup> cgs | occ no. | unocc no. | %    |
|-----------------------------------------|---------------|----------------|----------|----------------------------------|---------|-----------|------|
| <b>H6(DPP)<sub>2</sub>-III</b>          |               |                |          |                                  |         |           |      |
| 1                                       | 2.21          | 561            | 2.031    | 2657.21                          | 266     | 267       | 51.4 |
|                                         |               |                |          |                                  | 265     | 268       | 43.9 |
|                                         |               |                |          |                                  | 264     | 269       | 1.33 |
|                                         |               |                |          |                                  | 262     | 270       | 0.66 |
| 2                                       | 2.28          | 544            | 0.980    | -2319.67                         | 265     | 267       | 47.7 |
|                                         |               |                |          |                                  | 266     | 268       | 47.6 |
|                                         |               |                |          |                                  | 264     | 270       | 0.90 |
|                                         |               |                |          |                                  | 262     | 269       | 0.64 |
| 264                                     | 268           | 0.64           |          |                                  |         |           |      |
| <b>(DPPBr)<sub>2</sub>-III</b>          |               |                |          |                                  |         |           |      |
| 1                                       | 2.39          | 518            | 1.250    | 1397.52                          | 203     | 205       | 47.5 |
|                                         |               |                |          |                                  | 204     | 206       | 50.8 |
| 2                                       | 2.41          | 514            | 0.446    | -1391.14                         | 203     | 205       | 51.1 |
|                                         |               |                |          |                                  | 204     | 206       | 47.8 |
| <b>(DPP-alkynyl-Ph)<sub>2</sub>-III</b> |               |                |          |                                  |         |           |      |
| 1                                       | 2.22          | 559            | 1.999    | 2038.28                          | 222     | 223       | 50.8 |
|                                         |               |                |          |                                  | 221     | 224       | 46.5 |
| 2                                       | 2.27          | 546            | 0.743    | -1920.42                         | 221     | 223       | 49.3 |
|                                         |               |                |          |                                  | 222     | 224       | 48.3 |

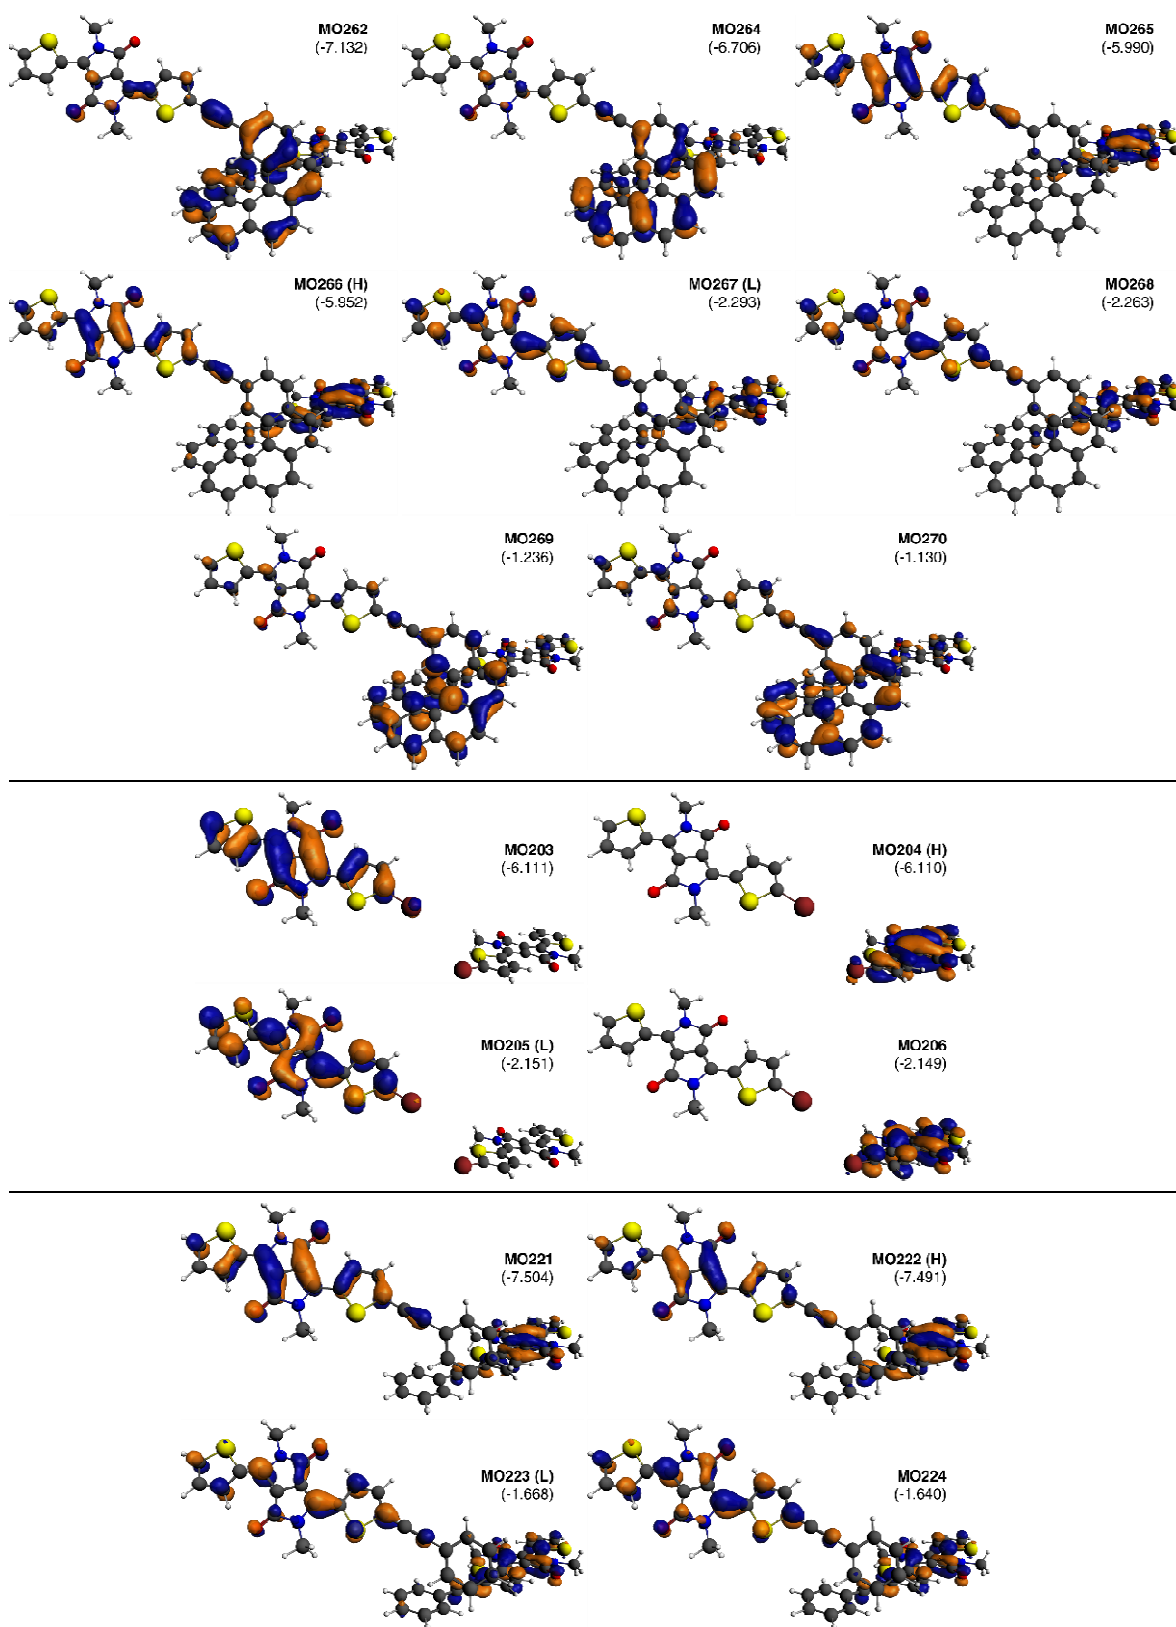

**Figure S2.14.** Isosurfaces ( $\pm 0.03$  au) of MOs involved in transitions of lowest-energy excitations of **H6(DPP)<sub>2</sub>-I** (top), **(DPPBr)<sub>2</sub>-I** (middle) and **(DPP-alkynyl-Ph)<sub>2</sub>-I** (bottom). ‘H’ = HOMO, ‘L’ = LUMO. Values listed in the parentheses are the corresponding orbital energies, in eV. Isosurfaces of the corresponding MOs for conformers II and III appeared to be very similar and therefore they are not shown.

## Analysis of exciton coupling effect in **H6(DPP)<sub>2</sub>**

In order to confirm the presence of an exciton coupling mechanism in **H6(DPP)<sub>2</sub>**, calculations were performed on a (DPPBr)<sub>2</sub> dimer in the same arrangement as the substituents in **H6(DPP)<sub>2</sub>**, as well as a (DPP-alkynyl-H)<sub>2</sub> dimer including the alkynyl group and a (DPP-alkynyl-Ph)<sub>2</sub> model including the alkynyl and the first phenyl group of the helicene (Figure S2.12). The corresponding calculated ECD spectra of the dimer models indeed show very similar spectral shapes as **H6(DPP)<sub>2</sub>** below 450 nm (Figure S2.13). The (DPPBr)<sub>2</sub> model produces rotatory strengths that are a factor of 2 to 3 lower than those of the **H6(DPP)<sub>2</sub>** rotamers, but they are already much larger than the rotatory strengths of the DPP-centered transitions in the mono-substituted **H6DPP**. The energetic splitting of the two coupled excitations is only 0.02 eV, and therefore the broadened ECD intensity remains much weaker for this model than for **H6(DPP)<sub>2</sub>**. When the coupled chromophores are extended, in models (DPP-alkynyl-H)<sub>2</sub> and (DPP-alkynyl-Ph)<sub>2</sub>, the exciton couplets increase dramatically in intensity, which goes along with a delocalization of the DPP frontier orbitals through the alkynyl into the phenyl groups (Figure S2.14) and an energetic splitting of the coupled excitations (0.05 to 0.06 eV) that is almost as large as in **H6(DPP)<sub>2</sub>** (0.07 eV). The rotatory strengths calculated for the lowest-energy exciton couplet of the (DPP-alkynyl-Ph)<sub>2</sub> model come close to those of **H6(DPP)<sub>2</sub>**. However, the simulated ECD intensities remain lower for the models, showing that the full helicene bridge in **H6(DPP)<sub>2</sub>** enhances the intensity of the couplet even further. The dimer model spectra also show that the resulting exciton CD couplet may appear conservative or not, depending on the relative orientations of the DPP moieties to each other.

Figure S2.14 displays the MOs involved in the exciton couplet of two of the model dimers and **H6(DPP)<sub>2</sub>** (based on conformer I). The assignment of the two lowest energy excitations for all three conformers of the (DPPBr)<sub>2</sub> is an approximately 50-50 mix of HOMO-1-to-LUMO and HOMO-to-LUMO+1, respectively. The HOMO-1 and LUMO are centered on one of the DPPBr, while the HOMO and LUMO+1 are centered on the other DPPBr. Therefore, the calculation indeed produces the coupled pair of one-electron excitations expected for an exciton coupling between essentially non-interacting chromophores. The relevant (DPP-alkynyl-Ph)<sub>2</sub> model frontier orbitals appear as  $\pm$  linear combinations of the DPP orbitals, similar to those in the full **H6(DPP)<sub>2</sub>** system. The small energetic splitting between HOMO-1 and HOMO, and LUMO and LUMO+1, respectively, indicates weak through-space electrostatic interactions in the dimer model. The models for *P*-**H6(DPP)<sub>2</sub>** therefore show unambiguously that the longest-wavelength ECD band is caused by exciton coupling between the two electric transition dipoles of the DPP-alkynyl-phenyl fragments at the extremities of *P*-**H6(DPP)<sub>2</sub>**, with minor contributions of the central part of the helicene.

**Optimized (BP/SV(P) with the continuum solvent model for CH<sub>2</sub>Cl<sub>2</sub>) geometries of helicene-DPP derivatives along with the corresponding absolute energies:**

The atomic symbol followed by three Cartesian coordinates, in Å.

|                                |            |            |            |            |            |            |            |
|--------------------------------|------------|------------|------------|------------|------------|------------|------------|
| <b>DPPBr</b>                   |            | C          | -1.8569420 | 0.4315637  | -1.2095431 |            |            |
| Total energy = -4246.074553 au |            | C          | -2.7475777 | -0.6679603 | -0.9933778 |            |            |
| C                              | 0.8528512  | 1.3601255  | 0.8121911  | C          | -0.6255275 | -3.5526838 | -2.1196333 |
| N                              | -0.2270727 | 1.3344677  | 1.6909209  | C          | 0.5841667  | -3.7742580 | -2.7356029 |
| C                              | -1.1691518 | 0.2959043  | 1.3447281  | C          | 1.5438848  | -2.7161426 | -2.8965879 |
| O                              | -2.2032035 | 0.0942854  | 1.9957992  | C          | 1.3062474  | -1.4236717 | -2.3178765 |
| C                              | -0.5888600 | -0.3287203 | 0.1725028  | C          | 2.7133096  | -2.9507810 | -3.6892457 |
| C                              | 0.6394423  | 0.3297736  | -0.1324707 | C          | 3.5713633  | -1.9127957 | -3.9777840 |
| C                              | 1.2170478  | -0.2913207 | -1.3082754 | C          | 3.4271876  | -0.6467001 | -3.3245844 |
| O                              | 2.2527063  | -0.0954495 | -1.9579039 | C          | 2.3983590  | -0.4540288 | -2.3311668 |
| N                              | 0.2688924  | -1.3236735 | -1.6598507 | C          | 4.3114365  | 0.4269094  | -3.6650059 |
| C                              | 0.5125286  | -2.1771135 | -2.8080460 | C          | 4.2107236  | 1.6447386  | -3.0295208 |
| C                              | -0.8103027 | -1.3483721 | -0.7806670 | C          | 3.3682093  | 1.7872117  | -1.8802772 |
| H                              | 1.4792237  | -1.8472855 | -3.2423651 | C          | 2.5513938  | 0.6918539  | -1.4387123 |
| H                              | -0.2815888 | -2.0638728 | -3.5782907 | C          | 3.3933643  | 3.0208445  | -1.1429468 |
| H                              | 0.6003327  | -3.2455474 | -2.5123553 | C          | 2.7252516  | 3.1516408  | 0.0522886  |
| C                              | -0.4739691 | 2.1888107  | 2.8381624  | C          | 2.0824081  | 2.0151475  | 0.6441021  |
| H                              | -0.5736727 | 3.2552219  | 2.5396023  | C          | 2.0299584  | 0.7623837  | -0.0713221 |
| H                              | 0.3276650  | 2.0882992  | 3.6020765  | C          | 1.5482533  | -0.3733254 | 0.6330932  |
| H                              | -1.4340503 | 1.8486637  | 3.2789624  | C          | 1.0613079  | -0.2898535 | 1.9513451  |
| C                              | 1.9678213  | 2.2726586  | 0.8614602  | C          | 1.0401056  | 0.9811032  | 2.6098103  |
| C                              | 3.0465389  | 2.2763968  | -0.0385372 | C          | 1.5525910  | 2.0955254  | 1.9653637  |
| H                              | 3.1105613  | 1.5502419  | -0.8661940 | C          | 0.5970438  | -1.4598222 | 2.6295296  |
| C                              | 4.0023113  | 3.2890029  | 0.2345752  | C          | 0.1859276  | -2.4642592 | 3.2249848  |
| H                              | 4.9144574  | 3.4516548  | -0.3593180 | C          | -2.3023323 | 1.7736503  | -0.9987405 |
| C                              | 3.6655575  | 4.0619063  | 1.3377999  | C          | -2.6925820 | 2.9324673  | -0.8055480 |
| H                              | 4.2142948  | 4.9085434  | 1.7746867  | Si         | -0.4344407 | -3.9949973 | 4.0738599  |
| S                              | 2.1770968  | 3.5594642  | 2.0548406  | H          | 0.6429895  | 1.0554603  | 3.6345015  |
| C                              | -1.9386215 | -2.2425341 | -0.8425174 | H          | 1.5832288  | 3.0675814  | 2.4853940  |
| S                              | -2.1768745 | -3.4873249 | -2.0773723 | H          | 2.7341392  | 4.1067949  | 0.6028653  |
| C                              | -3.0140886 | -2.2486918 | 0.0605280  | H          | 3.9721218  | 3.8630594  | -1.5577458 |
| H                              | -3.0583580 | -1.5441815 | 0.9087061  | H          | 4.8341895  | 2.4996313  | -3.3398587 |
| C                              | -4.0037658 | -3.2216230 | -0.2282129 | H          | 5.0479574  | 0.2679554  | -4.4701418 |
| H                              | -4.9172096 | -3.3754578 | 0.3641952  | H          | 4.4043689  | -2.0475274 | -4.6877317 |
| C                              | -3.6867911 | -3.9661696 | -1.3573174 | H          | 2.8650683  | -3.9506486 | -4.1285500 |
| Br                             | -4.6917485 | -5.3580829 | -2.1220438 | H          | 0.8399145  | -4.7724557 | -3.1285595 |
| <b>H6(TMS)<sub>2</sub></b>     |            |            |            | H          | -1.3489243 | -4.3737361 | -1.9841443 |
| Total energy = -1969.002266 au |            |            |            | H          | -3.0170184 | -2.8055613 | -1.1429438 |
| C                              | -2.3205112 | -1.9586636 | -1.2612118 | H          | -3.7740468 | -0.4749273 | -0.6436283 |
| C                              | -0.9994828 | -2.2258728 | -1.7262472 | H          | 0.1176682  | 1.0357394  | -1.8210388 |
| C                              | -0.0579447 | -1.1403605 | -1.8646296 | H          | 1.5806823  | -1.3622544 | 0.1569424  |
| C                              | -0.5394430 | 0.1761346  | -1.6346914 | Si         | -3.2181266 | 4.6884886  | -0.5087101 |

|                                |            |            |            |    |            |            |            |
|--------------------------------|------------|------------|------------|----|------------|------------|------------|
| C                              | -0.1842751 | -3.7949245 | 5.9437855  | C  | 2.5413199  | -2.3534818 | -0.0042489 |
| C                              | -2.2774299 | -4.2023935 | 3.6705640  | C  | 2.0225790  | -3.4834304 | 0.6829315  |
| C                              | 0.5632383  | -5.4684950 | 3.4158056  | C  | 1.5639705  | -3.4093112 | 2.0117084  |
| C                              | -5.0519102 | 4.8604063  | -0.9637267 | C  | 1.5942160  | -2.1494854 | 2.6913327  |
| C                              | -2.9502499 | 5.0937571  | 1.3261936  | C  | 2.1357113  | -1.0411248 | 2.0598870  |
| C                              | -2.1457515 | 5.8065856  | -1.6038909 | C  | 1.0921400  | -4.5785710 | 2.6861419  |
| H                              | -5.3921403 | 5.9080585  | -0.7977009 | C  | 0.6897618  | -5.5831711 | 3.2874547  |
| H                              | -5.2275124 | 4.6064652  | -2.0330640 | C  | -1.7045445 | -1.0228024 | -1.0502024 |
| H                              | -5.6854025 | 4.1907377  | -0.3398529 | C  | -1.9919084 | 0.1713835  | -0.8982600 |
| H                              | -3.2468569 | 6.1470229  | 1.5352347  | Si | 0.0911895  | -7.0992846 | 4.1786787  |
| H                              | -3.5598484 | 4.4286773  | 1.9779658  | H  | 1.2155103  | -2.0801781 | 3.7231366  |
| H                              | -1.8816098 | 4.9721193  | 1.6118591  | H  | 2.2044308  | -0.0801844 | 2.5967184  |
| H                              | -2.4220480 | 6.8756205  | -1.4572451 | H  | 3.3932517  | 0.9446350  | 0.7209209  |
| H                              | -1.0668343 | 5.6905549  | -1.3563979 | H  | 4.6263399  | 0.6772740  | -1.4391535 |
| H                              | -2.2806219 | 5.5588751  | -2.6805992 | H  | 5.4354747  | -0.7116701 | -3.2431461 |
| H                              | -2.6769312 | -5.1208365 | 4.1582645  | H  | 5.5371301  | -2.9353512 | -4.4018909 |
| H                              | -2.8691134 | -3.3334505 | 4.0359550  | H  | 4.7514796  | -5.2136326 | -4.6661531 |
| H                              | -2.4404286 | -4.2944433 | 2.5736671  | H  | 3.1052100  | -7.0310785 | -4.1325985 |
| H                              | -0.5448532 | -4.7027486 | 6.4791722  | H  | 1.0205032  | -7.7434670 | -3.1387977 |
| H                              | 0.8908685  | -3.6520307 | 6.1935488  | H  | -1.1433941 | -7.2177725 | -2.0007331 |
| H                              | -0.7499034 | -2.9191157 | 6.3336768  | H  | -2.7218815 | -5.5440339 | -1.1660670 |
| H                              | 0.2231172  | -6.4139174 | 3.8966207  | H  | -3.3398640 | -3.1690054 | -0.6956649 |
| H                              | 0.4379960  | -5.5757421 | 2.3150474  | H  | 0.6708143  | -1.9191557 | -1.7939925 |
| H                              | 1.6485791  | -5.3433807 | 3.6283450  | H  | 2.0102268  | -4.4625841 | 0.1859162  |
| <b>H6DPP-I</b>                 |            |            |            | C  | -2.2712763 | 1.5350584  | -0.7271188 |
| Total energy = -3231.847378 au |            |            |            | C  | 0.3821659  | -6.8540815 | 6.0373217  |
| C                              | -1.9709923 | -4.7441764 | -1.2778984 | C  | -1.7586339 | -7.3181642 | 3.8171249  |
| C                              | -0.6620613 | -5.0983564 | -1.7232004 | C  | 1.0750084  | -8.5893137 | 3.5375133  |
| C                              | 0.3508957  | -4.0765341 | -1.8427201 | S  | -0.9936023 | 2.7265971  | -0.9477314 |
| C                              | -0.0453774 | -2.7330253 | -1.6208637 | C  | -2.0837753 | 4.0602711  | -0.5719925 |
| C                              | -1.3557236 | -2.3890921 | -1.2279678 | C  | -3.3752033 | 3.5677100  | -0.2937758 |
| C                              | -2.3213232 | -3.4285981 | -1.0239029 | C  | -3.4799539 | 2.1669971  | -0.3795279 |
| C                              | -0.3688458 | -6.4426663 | -2.1229927 | H  | -4.4056987 | 1.6027237  | -0.1953244 |
| C                              | 0.8289547  | -6.7348603 | -2.7359397 | H  | -4.2053777 | 4.2461686  | -0.0348804 |
| C                              | 1.8558660  | -5.7395939 | -2.8826188 | C  | -1.7101474 | 5.4482323  | -0.5470404 |
| C                              | 1.6977474  | -4.4436279 | -2.2869027 | N  | -0.4426535 | 5.9652451  | -0.8115763 |
| C                              | 3.0114677  | -6.0311181 | -3.6776726 | C  | 0.7652169  | 5.2454545  | -1.1716774 |
| C                              | 3.9298887  | -5.0407887 | -3.9511747 | H  | 0.6431392  | 4.6943105  | -2.1296156 |
| C                              | 3.8618518  | -3.7780115 | -3.2788094 | H  | 1.0748783  | 4.5401982  | -0.3698290 |
| C                              | 2.8445817  | -3.5424621 | -2.2840070 | H  | 1.5581010  | 6.0117720  | -1.2985809 |
| C                              | 4.8049171  | -2.7487918 | -3.5986776 | C  | -0.4186707 | 7.4024632  | -0.6890422 |
| C                              | 4.7659159  | -1.5357583 | -2.9459150 | O  | 0.6088473  | 8.0670813  | -0.8801272 |
| C                              | 3.9277330  | -1.3634009 | -1.7969329 | C  | -1.7800395 | 7.7478195  | -0.3262482 |
| C                              | 3.0564055  | -2.4222216 | -1.3736246 | C  | -2.5468435 | 6.5492299  | -0.2463144 |
| C                              | 4.0078517  | -0.1438007 | -1.0397591 | C  | -3.9072416 | 6.8956367  | 0.1183262  |
| C                              | 3.3424550  | -0.0010119 | 0.1561925  | O  | -4.9349497 | 6.2323120  | 0.3102213  |
| C                              | 2.6515942  | -1.1174825 | 0.7326805  | N  | -3.8816984 | 8.3345252  | 0.2419317  |

|   |            |            |            |    |            |            |            |
|---|------------|------------|------------|----|------------|------------|------------|
| C | -5.0885710 | 9.0553760  | 0.6031411  | C  | 3.0640345  | -2.7644218 | 1.6082586  |
| H | -5.8839878 | 8.2908627  | 0.7237407  | C  | 3.0552911  | -1.5029700 | 2.2851195  |
| H | -5.3927106 | 9.7675540  | -0.1946103 | C  | 3.5711917  | -0.3823364 | 1.6539940  |
| H | -4.9663049 | 9.6008196  | 1.5643280  | C  | 2.6042433  | -3.9430084 | 2.2743302  |
| C | -2.6151927 | 8.8485155  | -0.0210230 | C  | 2.2014173  | -4.9559722 | 2.8609348  |
| C | -2.2353905 | 10.2381005 | 0.0155003  | C  | -0.3352927 | -0.6200370 | -1.3836171 |
| C | -0.9463828 | 10.7282723 | -0.2538570 | C  | -0.7918134 | 0.5114984  | -1.1752181 |
| H | -0.1164667 | 10.0530175 | -0.5213720 | Si | 1.5754489  | -6.4804969 | 3.7176347  |
| C | -0.8476119 | 12.1392600 | -0.1435617 | H  | 2.6654675  | -1.4410177 | 3.3132355  |
| H | 0.0795009  | 12.7065990 | -0.3163601 | H  | 3.6101131  | 0.5818697  | 2.1878334  |
| C | -2.0510217 | 12.7362506 | 0.2082186  | H  | 4.7708824  | 1.6375922  | 0.3167073  |
| H | -2.2675010 | 13.8029727 | 0.3632991  | H  | 6.0110600  | 1.4071888  | -1.8438494 |
| S | -3.3175973 | 11.5792748 | 0.4083985  | H  | 6.8644732  | 0.0519261  | -3.6422954 |
| H | 0.0320424  | -7.7474290 | 6.6033339  | H  | 7.0588208  | -2.1713522 | -4.7911123 |
| H | 1.4630031  | -6.7074180 | 6.2587130  | H  | 6.3818082  | -4.4756002 | -5.0400948 |
| H | -0.1718990 | -5.9666381 | 6.4172642  | H  | 4.8190035  | -6.3654440 | -4.5021224 |
| H | 0.7371700  | -9.5217851 | 4.0447837  | H  | 2.7776098  | -7.1700525 | -3.5201593 |
| H | 0.9330289  | -8.7219973 | 2.4416073  | H  | 0.5853610  | -6.7528787 | -2.3884747 |
| H | 2.1637595  | -8.4653014 | 3.7323597  | H  | -1.0697146 | -5.1740470 | -1.5499393 |
| H | -2.1459840 | -8.2268637 | 4.3322424  | H  | -1.8097129 | -2.8397189 | -1.0555562 |
| H | -2.3445539 | -6.4421508 | 4.1747872  | H  | 2.1180544  | -1.3632056 | -2.1740954 |
| H | -1.9423902 | -7.4346761 | 2.7258182  | H  | 3.5584753  | -3.8120385 | -0.2068273 |

#### H6DPP-II

Total energy = -3231.847271 au

|   |            |            |            |   |            |            |            |
|---|------------|------------|------------|---|------------|------------|------------|
| C | -0.3641084 | -4.3338630 | -1.6608382 | C | 1.8319833  | -6.2639053 | 5.5846070  |
| C | 0.9597900  | -4.6122659 | -2.1135905 | C | -0.2697582 | -6.6716542 | 3.3172071  |
| C | 1.9157922  | -3.5359859 | -2.2344910 | C | 2.5569246  | -7.9710057 | 3.0738479  |
| C | 1.4480046  | -2.2156017 | -2.0020804 | S | -3.0498849 | 1.8951480  | -0.4648050 |
| C | 0.1242014  | -1.9486272 | -1.5949598 | C | -2.9527916 | 3.6501517  | -0.3228832 |
| C | -0.7818077 | -3.0421842 | -1.3942710 | C | -1.6468795 | 4.0886201  | -0.6232791 |
| C | 1.3199387  | -5.9400258 | -2.5120991 | C | -0.7590827 | 3.0477451  | -0.9546934 |
| C | 2.5318675  | -6.1717592 | -3.1214013 | H | 0.2983963  | 3.1964365  | -1.2174217 |
| C | 3.5051817  | -5.1246218 | -3.2680095 | H | -1.3778775 | 5.1577595  | -0.5892167 |
| C | 3.2804717  | -3.8340216 | -2.6795769 | C | -4.0455456 | 4.5073573  | 0.0509036  |
| C | 4.6762795  | -5.3671941 | -4.0560961 | N | -5.3474651 | 4.1003709  | 0.3402954  |
| C | 5.5479748  | -4.3371493 | -4.3319305 | C | -5.8947412 | 2.7560130  | 0.3268717  |
| C | 5.4165579  | -3.0753987 | -3.6677814 | H | -5.3899521 | 2.1007835  | 1.0699747  |
| C | 4.3849878  | -2.8791230 | -2.6782313 | H | -5.8281483 | 2.2971907  | -0.6837041 |
| C | 6.3171588  | -2.0100970 | -3.9912205 | H | -6.9645622 | 2.8539561  | 0.6058403  |
| C | 6.2279010  | -0.7974809 | -3.3438085 | C | -6.1911948 | 5.2195912  | 0.6823717  |
| C | 5.3813282  | -0.6561027 | -2.1972659 | O | -7.3870589 | 5.0835953  | 0.9741814  |
| C | 4.5484031  | -1.7456931 | -1.7725098 | C | -5.3101018 | 6.3673307  | 0.5844835  |
| C | 5.4198672  | 0.5670928  | -1.4428641 | C | -4.0146105 | 5.9148143  | 0.1992262  |
| C | 4.7509961  | 0.6900219  | -0.2468694 | C | -3.1340827 | 7.0639305  | 0.1068292  |
| C | 4.0953006  | -0.4473292 | 0.3294489  | O | -1.9394031 | 7.2024431  | -0.1857849 |
| C | 4.0270491  | -1.6884730 | -0.4045973 | N | -3.9797018 | 8.1829170  | 0.4556904  |
| C | 3.5383704  | -2.8304121 | 0.2846500  | C | -3.4361389 | 9.5286043  | 0.4764267  |
|   |            |            |            | H | -2.3668642 | 9.4378026  | 0.1937050  |

|                                |            |            |            |   |            |             |            |
|--------------------------------|------------|------------|------------|---|------------|-------------|------------|
| H                              | -3.5023637 | 9.9797022  | 1.4905459  | C | 3.4305586  | 2.2243132   | 0.9844465  |
| H                              | -3.9472742 | 10.1871126 | -0.2593916 | C | 2.6536731  | -1.4099243  | 1.3490153  |
| C                              | -5.2789320 | 7.7732724  | 0.7409900  | C | 2.2947568  | -2.4806463  | 1.8556358  |
| C                              | -6.3769562 | 8.6257252  | 1.1219554  | C | -0.4382882 | 2.0141212   | -2.1579101 |
| C                              | -7.6804953 | 8.1832091  | 1.4037026  | C | -0.9085894 | 3.1391607   | -1.9466363 |
| H                              | -7.9516671 | 7.1156520  | 1.3494621  | C | 1.8851440  | -3.7071892  | 2.3993482  |
| C                              | -8.5676686 | 9.2340579  | 1.7519421  | H | 2.5820394  | 1.0110675   | 2.5657516  |
| H                              | -9.6282610 | 9.0854869  | 2.0055778  | H | 3.4152586  | 3.1515659   | 1.5812359  |
| C                              | -7.9552631 | 10.4802085 | 1.7397663  | H | 4.5188049  | 4.3913403   | -0.2105852 |
| H                              | -8.3951493 | 11.4622247 | 1.9653789  | H | 5.7646072  | 4.3776846   | -2.3797609 |
| S                              | -6.2873638 | 10.3818065 | 1.3026207  | H | 6.6835195  | 3.1970782   | -4.2707072 |
| H                              | 1.4576361  | -7.1584382 | 6.1327609  | H | 6.9984511  | 1.0701826   | -5.5661373 |
| H                              | 2.9100579  | -6.1353618 | 5.8294348  | H | 6.4530996  | -1.2557207  | -5.9613054 |
| H                              | 1.2827372  | -5.3729467 | 5.9632807  | H | 5.0058427  | -3.2624107  | -5.5375127 |
| H                              | 2.2013931  | -8.9062367 | 3.5634811  | H | 3.0095762  | -4.2433220  | -4.5966565 |
| H                              | 2.4335538  | -8.0892208 | 1.9740336  | H | 0.8049509  | -4.0133037  | -3.4383029 |
| H                              | 3.6431767  | -7.8602561 | 3.2895992  | H | -0.9369400 | -2.5704595  | -2.5144423 |
| H                              | -0.6817704 | -7.5783193 | 3.8163892  | H | -1.8051082 | -0.3050061  | -1.9155626 |
| H                              | -0.8488876 | -5.7894489 | 3.6706842  | H | 2.0412174  | 1.4317787   | -2.9416782 |
| H                              | -0.4332936 | -6.7752212 | 2.2214164  | H | 3.6099176  | -1.0668072  | -1.1056294 |
| <b>H6(DPP)<sub>2</sub>-I</b>   |            |            |            | C | -1.4500188 | 4.4094984   | -1.7017185 |
| Total energy = -4494.692393 au |            |            |            | S | 2.0240467  | -5.1849011  | 1.4520910  |
| C                              | -0.2780504 | -1.6887762 | -2.5823317 | C | 1.3419113  | -6.1600955  | 2.7533755  |
| C                              | 1.0588244  | -1.8731817 | -3.0460421 | C | 1.0312402  | -5.3435947  | 3.8599723  |
| C                              | 1.9549340  | -0.7425522 | -3.1077462 | C | 1.3333569  | -3.9831240  | 3.6647083  |
| C                              | 1.4175084  | 0.5372054  | -2.8133097 | H | 1.1606310  | -3.1965418  | 4.4136085  |
| C                              | 0.0790486  | 0.7138018  | -2.4048768 | H | 0.5906363  | -5.7646007  | 4.7794001  |
| C                              | -0.7662927 | -0.4349578 | -2.2569568 | C | 1.1295050  | -7.5808564  | 2.6935984  |
| C                              | 1.4922040  | -3.1548107 | -3.5172006 | N | 1.4302377  | -8.4135247  | 1.6165689  |
| C                              | 2.7125206  | -3.2840168 | -4.1409646 | C | 2.0161618  | -8.0545276  | 0.3380157  |
| C                              | 3.6269830  | -2.1784803 | -4.2284729 | H | 3.0298806  | -7.6147161  | 0.4614454  |
| C                              | 3.3326921  | -0.9404925 | -3.5645640 | H | 1.3674966  | -7.3488533  | -0.2256653 |
| C                              | 4.8071647  | -2.3036416 | -5.0308163 | H | 2.1035883  | -8.9981636  | -0.2398327 |
| C                              | 5.6168950  | -1.2093299 | -5.2440623 | C | 1.0848905  | -9.7867038  | 1.8934397  |
| C                              | 5.4177657  | -0.0005310 | -4.5024725 | O | 1.2685330  | -10.6950880 | 1.0718839  |
| C                              | 4.3808341  | 0.0726473  | -3.5023770 | C | 0.5403256  | -9.7486751  | 3.2373162  |
| C                              | 6.2532170  | 1.1345921  | -4.7559395 | C | 0.5771945  | -8.4027374  | 3.7047363  |
| C                              | 6.0982754  | 2.2946153  | -4.0287508 | C | 0.0304038  | -8.3659668  | 5.0477210  |
| C                              | 5.2507113  | 2.3111620  | -2.8739589 | O | -0.1531269 | -7.4588718  | 5.8700752  |
| C                              | 4.4814444  | 1.1507699  | -2.5243685 | N | -0.3175950 | -9.7408355  | 5.3224738  |
| C                              | 5.2224857  | 3.4801623  | -2.0380230 | C | -0.9069541 | -10.1017896 | 6.5987943  |
| C                              | 4.5497987  | 3.4844558  | -0.8369036 | H | -0.9921857 | -9.1604640  | 7.1803140  |
| C                              | 3.9582627  | 2.2777052  | -0.3404961 | H | -0.2627141 | -10.8135259 | 7.1597074  |
| C                              | 3.9584414  | 1.0866809  | -1.1570374 | H | -1.9215619 | -10.5382034 | 6.4709699  |
| C                              | 3.5342275  | -0.1233012 | -0.5495288 | C | -0.0159920 | -10.5702951 | 4.2462289  |
| C                              | 3.0528664  | -0.1721642 | 0.7754404  | C | -0.2342241 | -11.9933146 | 4.1810864  |
| C                              | 2.9754833  | 1.0395033  | 1.5377191  | C | 0.0777713  | -12.8072730 | 3.0790242  |



|                                |            |             |            |   |            |            |            |
|--------------------------------|------------|-------------|------------|---|------------|------------|------------|
| H                              | 0.5267116  | -12.3902497 | 2.1620599  | C | 1.1325930  | -3.7615430 | -3.8032857 |
| C                              | -0.2423248 | -14.1745141 | 3.2818912  | C | 2.1669511  | -2.7679065 | -3.9025763 |
| H                              | -0.0724386 | -14.9641193 | 2.5343391  | C | 2.0122754  | -1.4990723 | -3.2519777 |
| C                              | -0.7972889 | -14.4165912 | 4.5315454  | C | 3.3283248  | -3.0293361 | -4.6997215 |
| H                              | -1.1375574 | -15.3715861 | 4.9570901  | C | 4.2575485  | -2.0348203 | -4.9181120 |
| S                              | -0.9344312 | -12.9755568 | 5.4732542  | C | 4.1923821  | -0.8037869 | -4.1891534 |
| S                              | -3.1386384 | 4.5816744   | -1.2325264 | C | 3.1650585  | -0.6082814 | -3.1967376 |
| C                              | -2.9972132 | 6.3362650   | -1.1288418 | C | 5.1463337  | 0.2335441  | -4.4446783 |
| C                              | -1.6849414 | 6.7375906   | -1.4519047 | C | 5.1083942  | 1.4128499  | -3.7319624 |
| C                              | -0.8266332 | 5.6696053   | -1.7709674 | C | 4.2569987  | 1.5348434  | -2.5860835 |
| H                              | 0.2306856  | 5.7864622   | -2.0498068 | C | 3.3733905  | 0.4623658  | -2.2300078 |
| H                              | -1.3902932 | 7.8004019   | -1.4424310 | C | 4.3321123  | 2.7119402  | -1.7638251 |
| C                              | -4.0609379 | 7.2310430   | -0.7617416 | C | 3.6488678  | 2.7967355  | -0.5710377 |
| N                              | -5.3725957 | 6.8720026   | -0.4562344 | C | 2.9464841  | 1.6560238  | -0.0620891 |
| C                              | -5.9625690 | 5.5456929   | -0.4466736 | C | 2.8443806  | 0.4606623  | -0.8645920 |
| H                              | -5.4780949 | 4.8869449   | 0.3068711  | C | 2.3281779  | -0.7054083 | -0.2437603 |
| H                              | -5.9115310 | 5.0684498   | -1.4496197 | C | 1.8594067  | -0.7041480 | 1.0865661  |
| H                              | -7.0285135 | 5.6812800   | -0.1686939 | C | 1.8721990  | 0.5208621  | 1.8316053  |
| C                              | -6.1761687 | 8.0246832   | -0.1275720 | C | 2.4142567  | 1.6610616  | 1.2622043  |
| O                              | -7.3736615 | 7.9338644   | 0.1746171  | C | 1.4089386  | -1.9135876 | 1.6813239  |
| C                              | -5.2580782 | 9.1411474   | -0.2515136 | C | 1.0371224  | -2.9745570 | 2.1987114  |
| C                              | -3.9818808 | 8.6386519   | -0.6385107 | C | -1.3844711 | 1.8989059  | -1.9434993 |
| C                              | -3.0635550 | 9.7549086   | -0.7577417 | C | -1.6787260 | 3.0907743  | -1.7861450 |
| O                              | -1.8669398 | 9.8475143   | -1.0624575 | C | 0.6309777  | -4.1996079 | 2.7481921  |
| N                              | -3.8668292 | 10.9074023  | -0.4227601 | H | 1.4839399  | 0.5348309  | 2.8617132  |
| C                              | -3.2765623 | 12.2333831  | -0.4324758 | H | 2.4730232  | 2.5935367  | 1.8479566  |
| H                              | -2.2148293 | 12.0997300  | -0.7266939 | H | 3.6966968  | 3.7114413  | 0.0424547  |
| H                              | -3.3140916 | 12.7044128  | 0.5740186  | H | 4.9606435  | 3.5496152  | -2.1094700 |
| H                              | -3.7740590 | 12.8965612  | -1.1733503 | H | 5.7884476  | 2.2445829  | -3.9791634 |
| C                              | -5.1770774 | 10.5477870  | -0.1202290 | H | 5.8880241  | 0.0826593  | -5.2466804 |
| C                              | -6.2406575 | 11.4452713  | 0.2537906  | H | 5.0863645  | -2.1827002 | -5.6303037 |
| C                              | -7.5564017 | 11.0549253  | 0.5549481  | H | 3.4201988  | -4.0080197 | -5.1988702 |
| H                              | -7.8660439 | 9.9968674   | 0.5231416  | H | 1.3186112  | -4.7533229 | -4.2480060 |
| C                              | -8.4023488 | 12.1432904  | 0.8908020  | H | -0.8440382 | -4.2638008 | -3.0911056 |
| H                              | -9.4652127 | 12.0378386  | 1.1563170  | H | -2.4164608 | -2.6135352 | -2.1902814 |
| C                              | -7.7460179 | 13.3663626  | 0.8496736  | H | -3.0232364 | -0.2526977 | -1.6417446 |
| H                              | -8.1483466 | 14.3677092  | 1.0602382  | H | 0.9978420  | 1.0120518  | -2.6840762 |
| S                              | -6.0868089 | 13.2000705  | 0.4002436  | H | 2.3287788  | -1.6576769 | -0.7909212 |
| <b>H6(DPP)<sub>2</sub>-II</b>  |            |             |            | C | -1.9677516 | 4.4526801  | -1.6172558 |
| Total energy = -4494.692156 au |            |             |            | S | 0.7615708  | -5.6757376 | 1.7970391  |
| C                              | -1.6608127 | -1.8147956  | -2.2719114 | C | 0.1068717  | -6.6551862 | 3.1086413  |
| C                              | -0.3527700 | -2.1603232  | -2.7267807 | C | -0.1909053 | -5.8413466 | 4.2204362  |
| C                              | 0.6657380  | -1.1405341  | -2.8029144 | C | 0.1007749  | -4.4790038 | 4.0218558  |
| C                              | 0.2760209  | 0.1971841   | -2.5387630 | H | -0.0627683 | -3.6942255 | 4.7746960  |
| C                              | -1.0351885 | 0.5355861   | -2.1442929 | H | -0.6148979 | -6.2659125 | 5.1458266  |
| C                              | -2.0047776 | -0.5064872  | -1.9746848 | C | -0.1004904 | -8.0765919 | 3.0505085  |
| C                              | -0.0650040 | -3.4888429  | -3.1803837 | N | 0.2004870  | -8.9094303 | 1.9739718  |

|   |            |             |            |                                |            |            |            |
|---|------------|-------------|------------|--------------------------------|------------|------------|------------|
| C | 0.7931139  | -8.5518691  | 0.6979762  | C                              | -2.3566845 | 11.7634885 | -0.9039229 |
| H | 1.8023464  | -8.1038509  | 0.8276533  | C                              | -1.9852983 | 13.1553075 | -0.8635967 |
| H | 0.1443256  | -7.8535902  | 0.1253066  | C                              | -0.7009193 | 13.6550447 | -1.1376522 |
| H | 0.8925657  | -9.4970292  | 0.1245024  | H                              | 0.1321961  | 12.9859743 | -1.4114083 |
| C | -0.1432074 | -10.2823293 | 2.2519775  | C                              | -0.6115326 | 15.0664059 | -1.0241918 |
| O | 0.0410475  | -11.1913853 | 1.4311599  | H                              | 0.3105158  | 15.6411162 | -1.2001322 |
| C | -0.6866478 | -10.2444180 | 3.5963117  | C                              | -1.8176692 | 15.6539002 | -0.6654751 |
| C | -0.6489183 | -8.8985011  | 4.0633996  | H                              | -2.0406388 | 16.7187095 | -0.5070256 |
| C | -1.1962651 | -8.8605211  | 5.4063428  | S                              | -3.0751579 | 14.4877145 | -0.4621537 |
| O | -1.3770478 | -7.9539100  | 6.2293885  | <b>H6(DPP)<sub>2</sub>-III</b> |            |            |            |
| N | -1.5468496 | -10.2354646 | 5.6808446  | Total energy = -4494.691988 au |            |            |            |
| C | -2.1381821 | -10.5941344 | 6.9573641  | C                              | -0.0177611 | -2.3445755 | -3.5469588 |
| H | -2.2145824 | -9.6527439  | 7.5403215  | C                              | 1.3044891  | -2.6262768 | -4.0025675 |
| H | -1.4994161 | -11.3124146 | 7.5161237  | C                              | 2.2690292  | -1.5558708 | -4.1083475 |
| H | -3.1565863 | -11.0215448 | 6.8295237  | C                              | 1.8101063  | -0.2353218 | -3.8599353 |
| C | -1.2459481 | -11.0650961 | 4.6044711  | C                              | 0.4870904  | 0.0358939  | -3.4527641 |
| C | -1.4682343 | -12.4873509 | 4.5379881  | C                              | -0.4270140 | -1.0533028 | -3.2651461 |
| C | -1.1574429 | -13.3006838 | 3.4351268  | C                              | 1.6525935  | -3.9506162 | -4.4218874 |
| H | -0.7065463 | -12.8837975 | 2.5190652  | C                              | 2.8617847  | -4.1823829 | -5.0361013 |
| C | -1.4812536 | -14.6672685 | 3.6365998  | C                              | 3.8438485  | -3.1415492 | -5.1661547 |
| H | -1.3128940 | -15.4568616 | 2.8889646  | C                              | 3.6314006  | -1.8575279 | -4.5583391 |
| C | -2.0376197 | -14.9092625 | 4.8857812  | C                              | 5.0097444  | -3.3834959 | -5.9614238 |
| H | -2.3801841 | -15.8638136 | 5.3108164  | C                              | 5.8902617  | -2.3580476 | -6.2241464 |
| S | -2.1721731 | -13.4688109 | 5.8286218  | C                              | 5.7725745  | -1.1055192 | -5.5409437 |
| S | -0.6973780 | 5.6528715   | -1.8350071 | C                              | 4.7436242  | -0.9108187 | -4.5473020 |
| C | -1.7996219 | 6.9801509   | -1.4722884 | C                              | 6.6856136  | -0.0478918 | -5.8528851 |
| C | -3.0885477 | 6.4791492   | -1.1988678 | C                              | 6.6108688  | 1.1582659  | -5.1929628 |
| C | -3.1828462 | 5.0773491   | -1.2795195 | C                              | 5.7649277  | 1.2970078  | -4.0460152 |
| H | -4.1057233 | 4.5065151   | -1.0996484 | C                              | 4.9182661  | 0.2131703  | -3.6312665 |
| H | -3.9244266 | 7.1525450   | -0.9460666 | C                              | 5.8205007  | 2.5132727  | -3.2828147 |
| C | -1.4353583 | 8.3705044   | -1.4489741 | C                              | 5.1512995  | 2.6368877  | -2.0868864 |
| N | -0.1733008 | 8.8960363   | -1.7225175 | C                              | 4.4787479  | 1.5056660  | -1.5218184 |
| C | 1.0347191  | 8.1854505   | -2.0998936 | C                              | 4.3954288  | 0.2681822  | -2.2627307 |
| H | 0.8990755  | 7.6233424   | -3.0493539 | C                              | 3.8910618  | -0.8702179 | -1.5804106 |
| H | 1.3698157  | 7.4915555   | -1.2983461 | C                              | 3.4132141  | -0.8005128 | -0.2552083 |
| H | 1.8168391  | 8.9584450   | -2.2507628 | C                              | 3.4181727  | 0.4610255  | 0.4272601  |
| C | -0.1574965 | 10.3327710  | -1.5965108 | C                              | 3.9512170  | 1.5740727  | -0.1981389 |
| O | 0.8640321  | 11.0044760  | -1.7947612 | C                              | 2.9361435  | -1.9545616 | 0.4233448  |
| C | -1.5179834 | 10.6689400  | -1.2215829 | C                              | 2.5094364  | -2.9231790 | 1.0649175  |
| C | -2.2769913 | 9.4654120   | -1.1401527 | C                              | 0.0370658  | 1.3661602  | -3.2337829 |
| C | -3.6370704 | 9.8014531   | -0.7631679 | C                              | -0.4093066 | 2.5018042  | -3.0267466 |
| O | -4.6592539 | 9.1318011   | -0.5682477 | C                              | 2.0075973  | -3.9808160 | 1.8379236  |
| N | -3.6186135 | 11.2410762  | -0.6324677 | H                              | 3.0251864  | 0.5245482  | 1.4538006  |
| C | -4.8265816 | 11.9529843  | -0.2561503 | H                              | 4.0016824  | 2.5364875  | 0.3377834  |
| H | -5.6147990 | 11.1815344  | -0.1295604 | H                              | 5.1844237  | 3.5790429  | -1.5151772 |
| H | -5.1445039 | 12.6656218  | -1.0482702 | H                              | 6.4258820  | 3.3469195  | -3.6760382 |
| H | -4.6971060 | 12.4964948  | 0.7051962  | H                              | 7.2574797  | 2.0034995  | -5.4812644 |

|   |            |             |            |   |            |             |            |
|---|------------|-------------|------------|---|------------|-------------|------------|
| H | 7.4260728  | -0.2097629  | -6.6536215 | C | -2.4262960 | -9.1921181  | 10.0880686 |
| H | 6.7190564  | -2.4929500  | -6.9386838 | H | -2.7523977 | -8.7751918  | 11.0530715 |
| H | 5.1405965  | -4.3758397  | -6.4235432 | C | -2.5517027 | -10.5351987 | 9.7583284  |
| H | 3.0976186  | -5.1750324  | -5.4543012 | H | -2.9685805 | -11.3535758 | 10.3627947 |
| H | 0.9102410  | -4.7582546  | -4.3112703 | S | -1.9496349 | -10.8760234 | 8.1760774  |
| H | -0.7284029 | -3.1820776  | -3.4487150 | S | -2.6627441 | 3.8942573   | -2.3265134 |
| H | -1.4544892 | -0.8480141  | -2.9265041 | C | -2.5620321 | 5.6491550   | -2.1929664 |
| H | 2.4856611  | 0.6147586   | -4.0226522 | C | -1.2541997 | 6.0837557   | -2.4911167 |
| H | 3.9017145  | -1.8497914  | -2.0762353 | C | -0.3678841 | 5.0389787   | -2.8145138 |
| C | -0.9646581 | 3.7650585   | -2.7745872 | H | 0.6907478  | 5.1832459   | -3.0746995 |
| S | 1.4041165  | -3.6582582  | 3.4606564  | H | -0.9833027 | 7.1524175   | -2.4614043 |
| C | 0.9936681  | -5.3535485  | 3.7162272  | C | -3.6553560 | 6.5086021   | -1.8262867 |
| C | 1.3257715  | -6.1102325  | 2.5736448  | N | -4.9586202 | 6.1042582   | -1.5389606 |
| C | 1.8878606  | -5.3491994  | 1.5310398  | C | -5.5088579 | 4.7609901   | -1.5500307 |
| H | 2.2085118  | -5.7643001  | 0.5643574  | H | -5.0091094 | 4.1070300   | -0.8024485 |
| H | 1.1462776  | -7.1978148  | 2.5324807  | H | -5.4393795 | 4.2985173   | -2.5587015 |
| C | 0.3992677  | -5.8823863  | 4.9141676  | H | -6.5796649 | 4.8617296   | -1.2760019 |
| N | 0.0638406  | -5.1554739  | 6.0559582  | C | -5.8011912 | 7.2259991   | -1.2022686 |
| C | 0.2363958  | -3.7354601  | 6.3036140  | O | -6.9979908 | 7.0930562   | -0.9127957 |
| H | -0.3498172 | -3.1204098  | 5.5864035  | C | -4.9180602 | 8.3722968   | -1.3018338 |
| H | 1.3075462  | -3.4400687  | 6.2630597  | C | -3.6227516 | 7.9161015   | -1.6831548 |
| H | -0.1468005 | -3.5502849  | 7.3287904  | C | -2.7397276 | 9.0630727   | -1.7771527 |
| C | -0.5226307 | -5.9982128  | 7.0693440  | O | -1.5438632 | 9.1976395   | -2.0685607 |
| O | -0.8951803 | -5.5566769  | 8.1649826  | N | -3.5830306 | 10.1843404  | -1.4328927 |
| C | -0.5274436 | -7.3189286  | 6.4699879  | C | -3.0371449 | 11.5289965  | -1.4153505 |
| C | 0.0369557  | -7.2274669  | 5.1644435  | H | -1.9681839 | 11.4359100  | -1.6982840 |
| C | 0.0280882  | -8.5483930  | 4.5651938  | H | -3.1023074 | 11.9824871  | -0.4021897 |
| O | 0.4004387  | -8.9912038  | 3.4706358  | H | -3.5477057 | 12.1867237  | -2.1522970 |
| N | -0.5629365 | -9.3899869  | 5.5799515  | C | -4.8835600 | 9.7784571   | -1.1482942 |
| C | -0.7407809 | -10.8097889 | 5.3368926  | C | -5.9790657 | 10.6348615  | -0.7691883 |
| H | -0.3499594 | -11.0037630 | 4.3165621  | C | -7.2846849 | 10.1978342  | -0.4877488 |
| H | -1.8140295 | -11.0984586 | 5.3708978  | H | -7.5606369 | 9.1313722   | -0.5417837 |
| H | -0.1660269 | -11.4235747 | 6.0643167  | C | -8.1675634 | 11.2526605  | -0.1396769 |
| C | -0.8972215 | -8.6621010  | 6.7180995  | H | -9.2290066 | 11.1091306  | 0.1138910  |
| C | -1.5058622 | -9.1848710  | 7.9154838  | C | -7.5497473 | 12.4962513  | -0.1518674 |
| C | -1.8360179 | -8.4251305  | 9.0505504  | H | -7.9853180 | 13.4803281  | 0.0736012  |
| H | -1.6412409 | -7.3405221  | 9.0954411  | S | -5.8823287 | 12.3906509  | -0.5887833 |

## References

<sup>2.1</sup> (a) TURBOMOLE V6.6 2014, a development of University of Karlsruhe and Forschungszentrum Karlsruhe GmbH, 1989-2007, TURBOMOLE GmbH, since 2007; available from <http://www.turbomole.com>, (b) R. Ahlrichs, M. Bär, M. Häser, H. Horn, C. Kölmel, *Chem. Phys. Lett.*

---

1989, **162**, 165. (c) F. Furche, R. Ahlrichs, C. Hättig, W. Klopper, M. Sierka, F. Weigend, *WIREs Comput. Mol. Sci.* 2014, **4**, 91.

<sup>2.2</sup> Gaussian 09, Revision D.01, M. J. Frisch, G. W. Trucks, H. B. Schlegel, G. E. Scuseria, M. A. Robb, J. R. Cheeseman, G. Scalmani, V. Barone, B. Mennucci, G. A. Petersson, H. Nakatsuji, M. Caricato, X. Li, H. P. Hratchian, A. F. Izmaylov, J. Bloino, G. Zheng, J. L. Sonnenberg, M. Hada, M. Ehara, K. Toyota, R. Fukuda, J. Hasegawa, M. Ishida, T. Nakajima, Y. Honda, O. Kitao, H. Nakai, T. Vreven, J. A. Montgomery, Jr., J. E. Peralta, F. Ogliaro, M. Bearpark, J. J. Heyd, E. Brothers, K. N. Kudin, V. N. Staroverov, R. Kobayashi, J. Normand, K. Raghavachari, A. Rendell, J. C. Burant, S. S. Iyengar, J. Tomasi, M. Cossi, N. Rega, J. M. Millam, M. Klene, J. E. Knox, J. B. Cross, V. Bakken, C. Adamo, J. Jaramillo, R. Gomperts, R. E. Stratmann, O. Yazyev, A. J. Austin, R. Cammi, C. Pomelli, J. W. Ochterski, R. L. Martin, K. Morokuma, V. G. Zakrzewski, G. A. Voth, P. Salvador, J. J. Dannenberg, S. Dapprich, A. D. Daniels, Ö. Farkas, J. B. Foresman, J. V. Ortiz, J. Cioslowski, and D. J. Fox, Gaussian, Inc., Wallingford CT, 2009.

<sup>2.3</sup> M. Srebro-Hooper, J. Autschbach, *Annu. Rev. Phys. Chem.* 2017, **68**, 399.

<sup>2.4</sup> (a) A. D. Becke, *Phys. Rev. A* 1988, **38**, 3098, (b) J. P. Perdew, *Phys. Rev. B* 1986, **33**, 8822, (c) J. P. Perdew, *Phys. Rev. B* 1986, **34**, 7406.

<sup>2.5</sup> (a) A. Schäfer, H. Horn, R. Ahlrichs, *J. Chem. Phys.* 1992, **97**, 2571, (b) K. Eichkorn, F. Weigend, O. Treutler, R. Ahlrichs, *Theor. Chem. Acc.* 1997, **97**, 119, (c) F. Weigend, R. Ahlrichs, *Phys. Chem. Chem. Phys.* 2005, **7**, 3297.

<sup>2.6</sup> (a) A. D. Becke, *J. Chem. Phys.* 1993, **98**, 1372; (b) C. Lee, W. Yang, R. G. Parr, *Phys. Rev. B* 1988, **37**, 785.

<sup>2.7</sup> (a) A. Klamt, G. J. Schuurmann, *J. Chem. Soc., Perkin Trans. 2* 1993, 799, (b) A. Klamt, *J. Phys. Chem.* 1996, **100**, 3349.

<sup>2.8</sup> J. Autschbach, T. Ziegler, S. J. A. van Gisbergen, E. J. Baerends, *J. Chem. Phys.* 2002, **116**, 6930.

<sup>2.9</sup> C. Adamo, V. Barone, *J. Chem. Phys.* 1999, **110**, 6158.

<sup>2.10</sup> (a) T. Yanai, D. P. Tew, N. C. Handy, *Chem. Phys. Lett.* 2004, **393**, 51, (b) J. Autschbach, M. Srebro, *Acc. Chem. Res.* 2014, **47**, 2592.

<sup>2.11</sup> (a) J. Tomasi, B. Mennucci, R. Cammi, *Chem. Rev.* **2005**, *105*, 2999, (b) M. Cossi, V. Barone, *J. Chem. Phys.* **2001**, *115*, 4708.
